# Supplementary material for: Cyanothioacetamides as a synthetic platform for the synthesis of aminopyrazole derivatives
Source: publisher site journal article supplement (doi:10.3762/bjoc.19.87), 2023-08-08

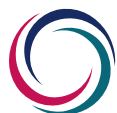

## Supporting Information

for

### **Cyanothioacetamides as a synthetic platform for the synthesis of aminopyrazole derivatives**

Valeriy O. Filimonov, Alexandra I. Topchiy, Vladimir G. Ilkin, Tetyana V. Beryozkina and Vasiliy A. Bakulev

*Beilstein J. Org. Chem.* **2023**, *19*, 1191–1197. [doi:10.3762/bjoc.19.87](https://doi.org/10.3762/bjoc.19.87)

### **Copies of NMR spectra of all new compounds**

**NMR spectra of compounds 2a,e, 4a–c, 5a–e, 6a–f, 7a–k**

**Figure S1.**  $^1\text{H}$  NMR spectrum ( $\text{DMSO-}d_6$ ) of **2a**.

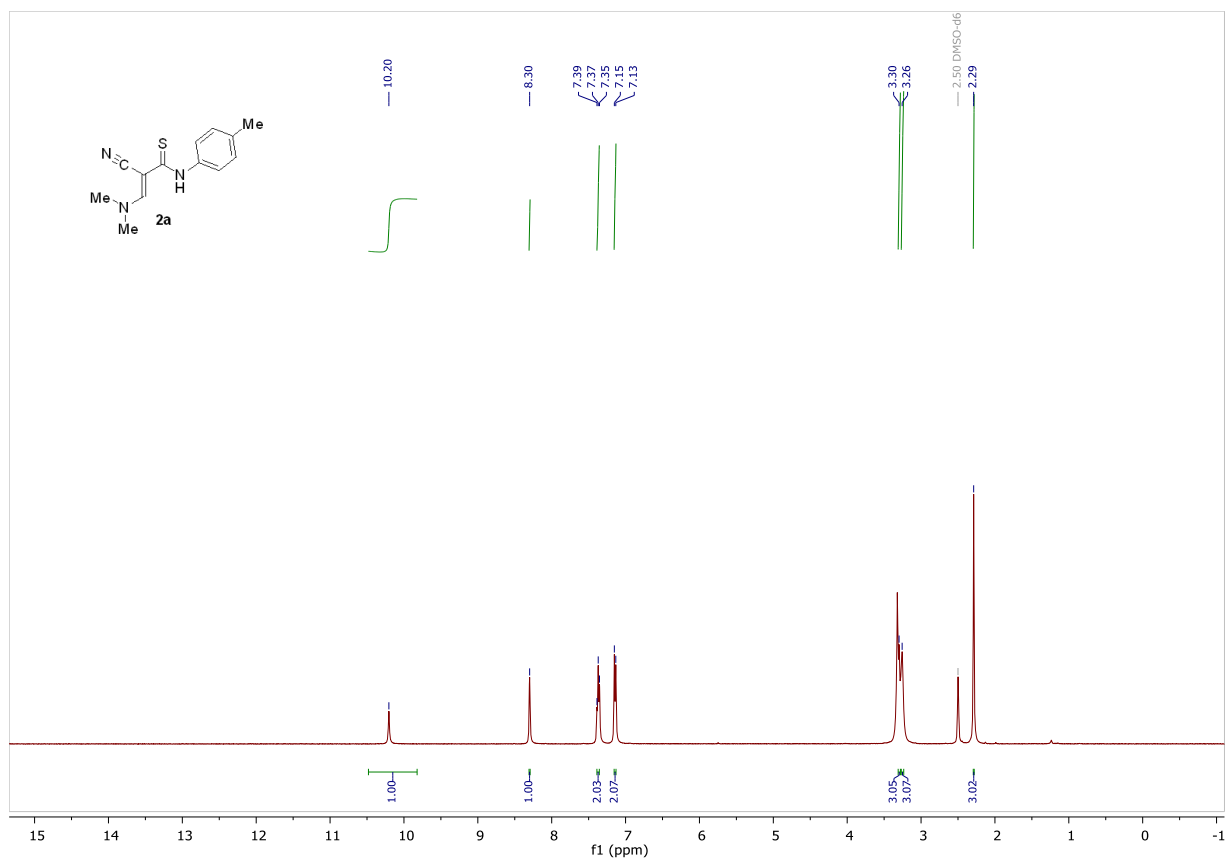

**Figure S2.**  $^{13}\text{C}$  NMR spectrum ( $\text{DMSO-}d_6$ ) of **2a**.

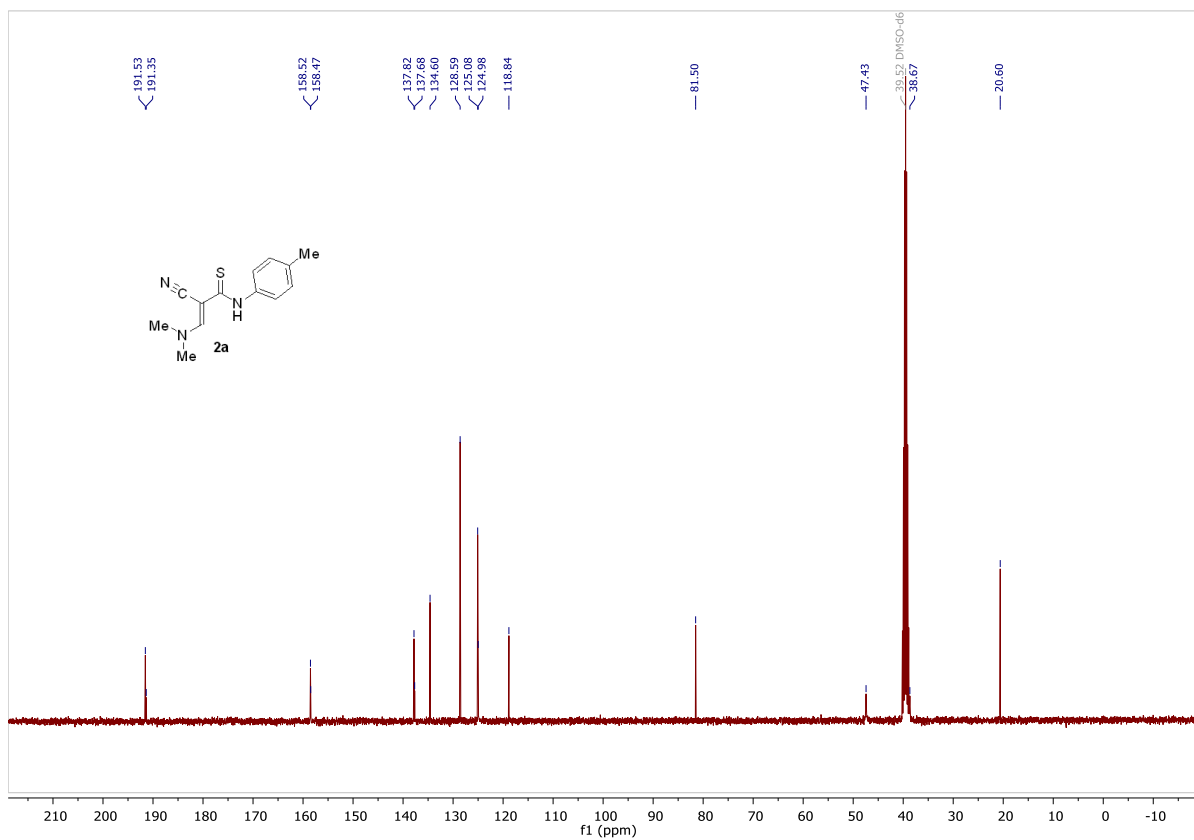

**Figure S3.**  $^1\text{H}$  NMR spectrum (DMSO- $d_6$ ) of **2e**.

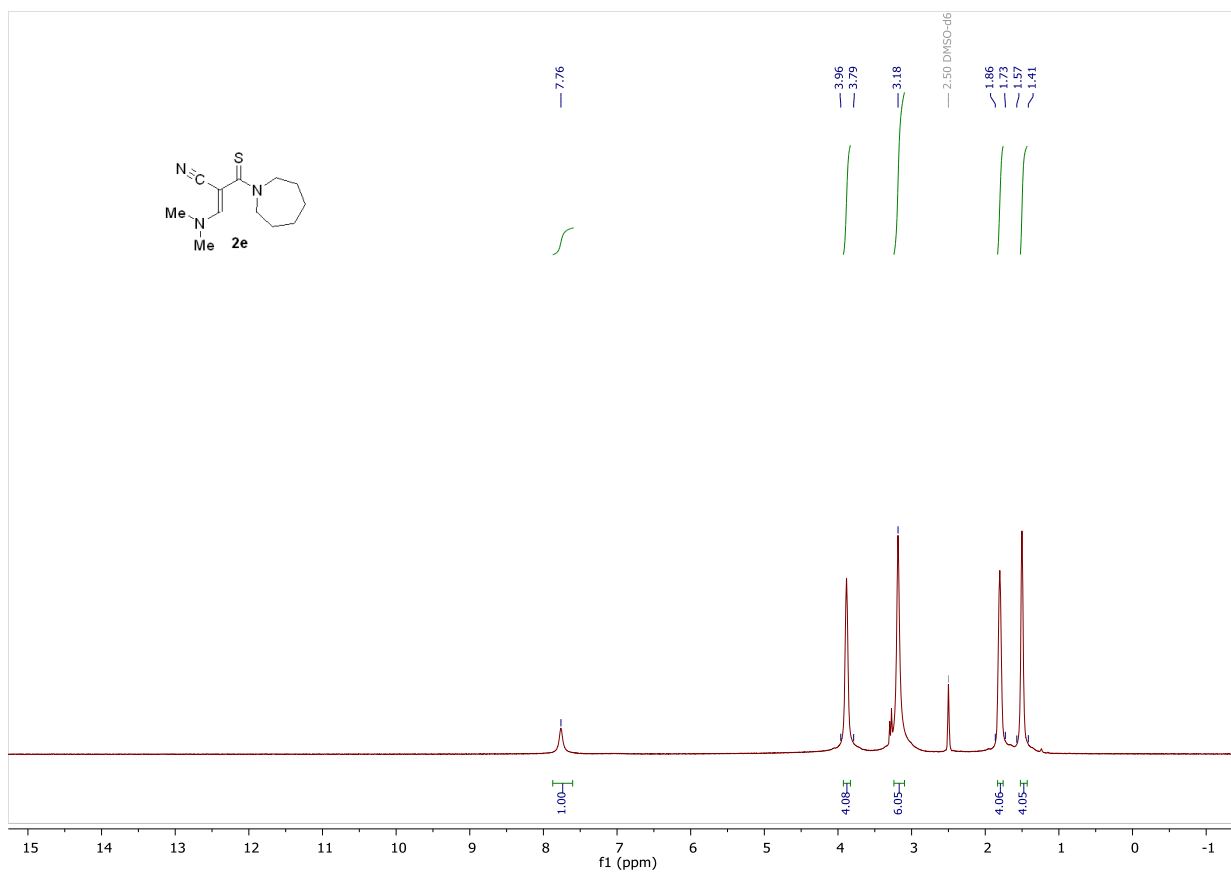

**Figure S4.**  $^{13}\text{C}$  NMR spectrum (DMSO- $d_6$ ) of **2e**.

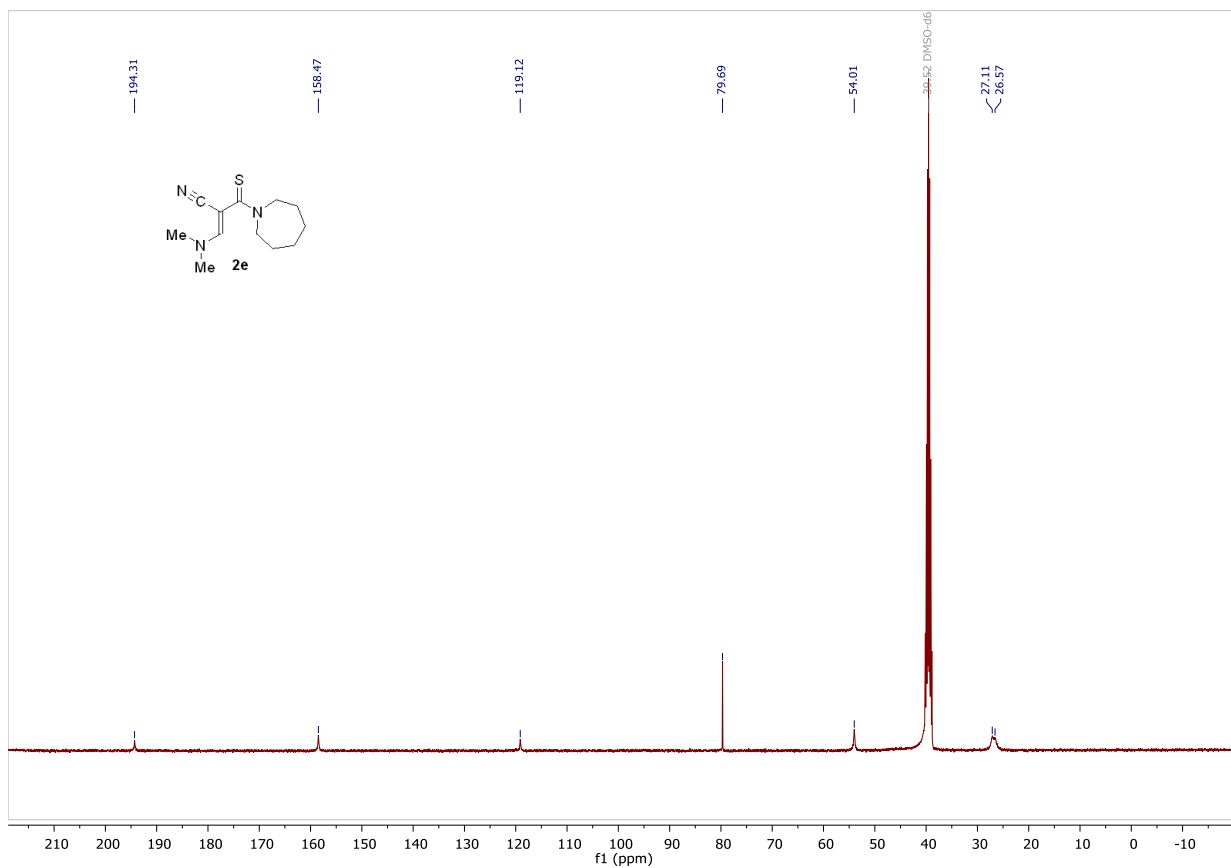

**Figure S5.**  $^1\text{H}$  NMR spectrum (DMSO- $d_6$ ) of **4a**.

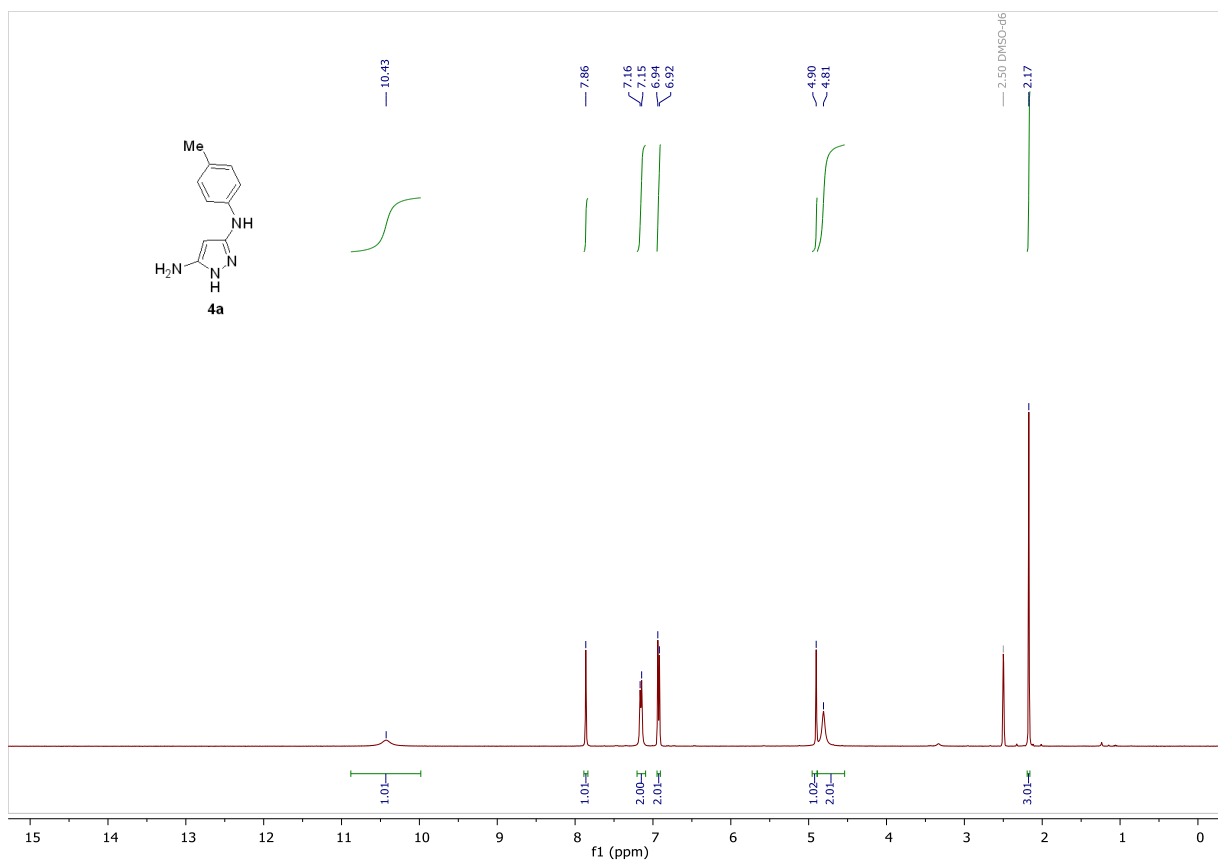

**Figure S6.**  $^{13}\text{C}$  NMR spectrum (DMSO- $d_6$ ) of **4a**.

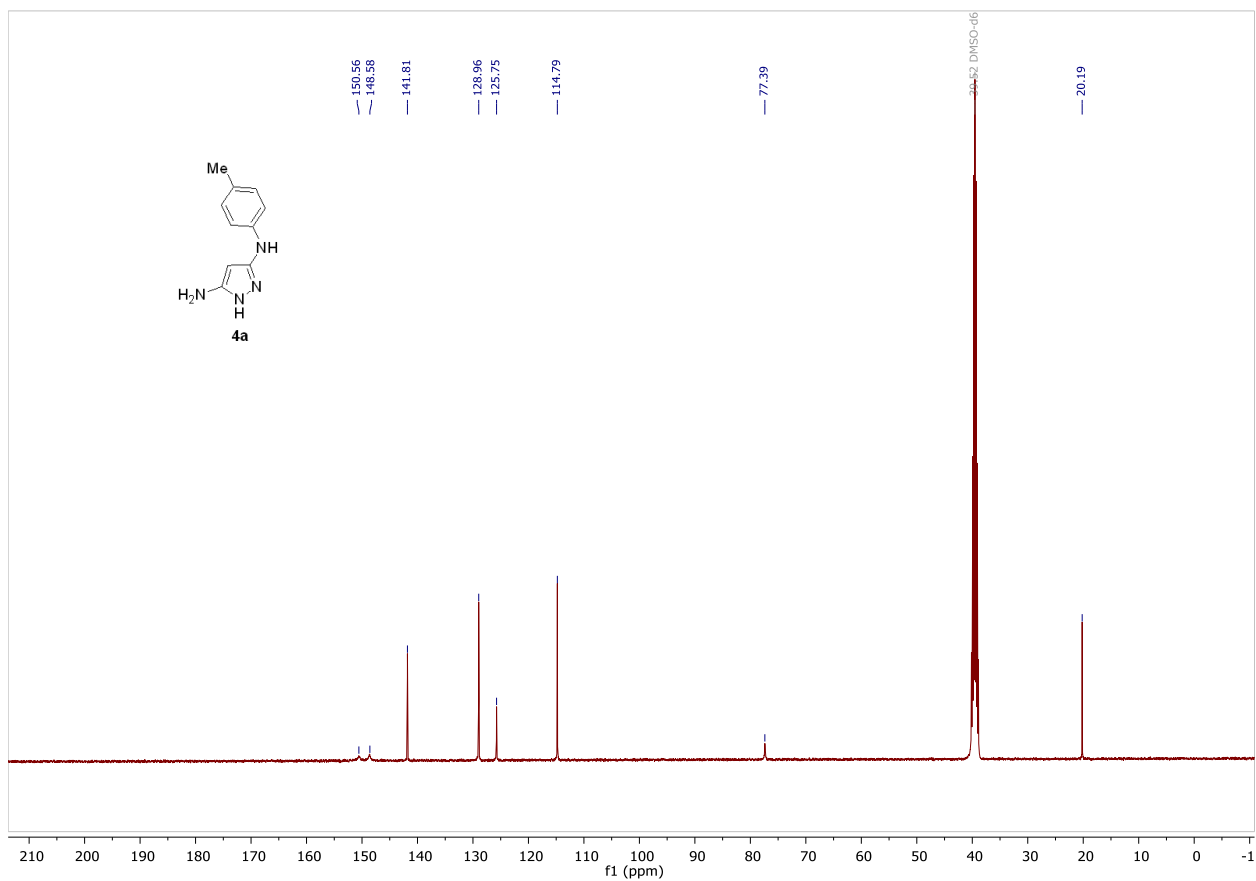

**Figure S7.**  $^1\text{H}$  NMR spectrum (DMSO- $d_6$ ) of **4b**.

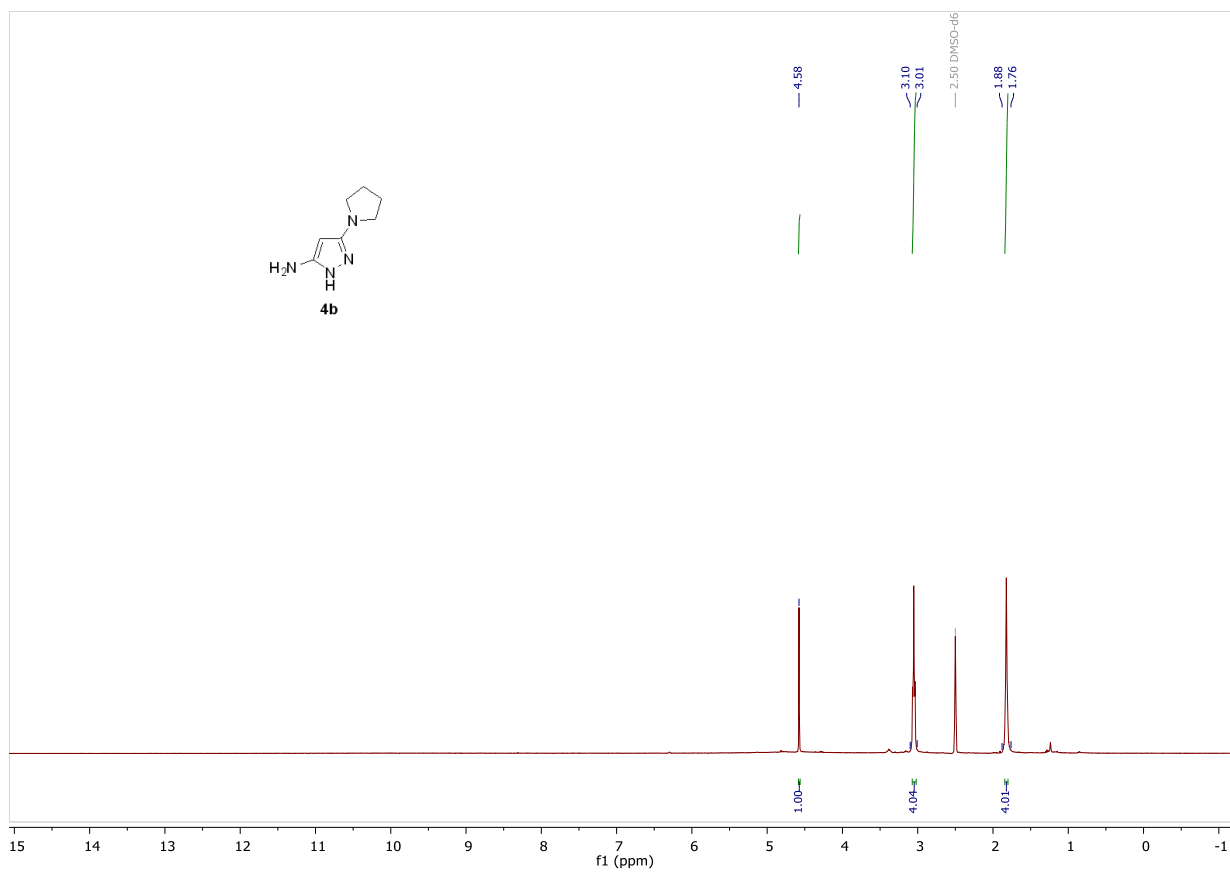

**Figure S8.**  $^{13}\text{C}$  NMR spectrum (DMSO- $d_6$ ) of **4b**.

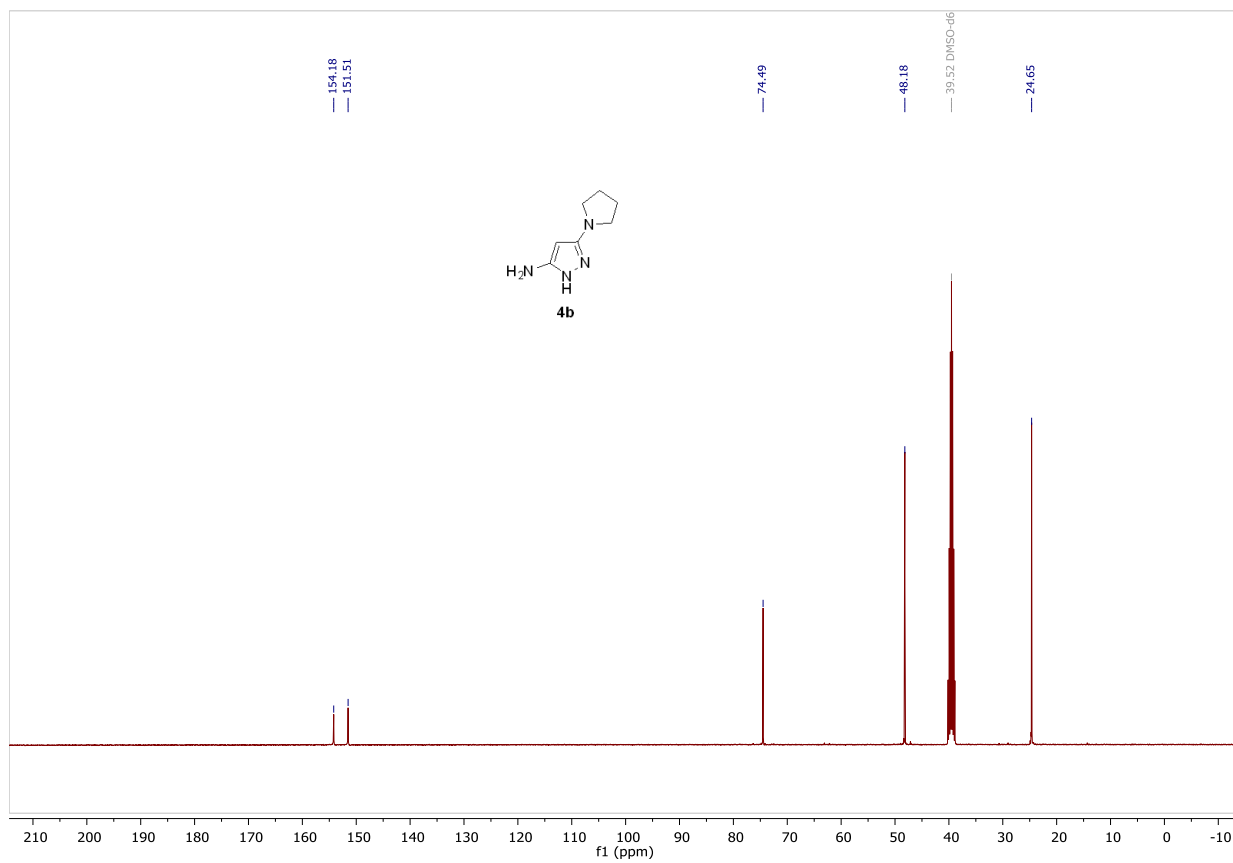

**Figure S9.**  $^1\text{H}$  NMR spectrum ( $\text{DMSO-}d_6$ ) of **4c**.

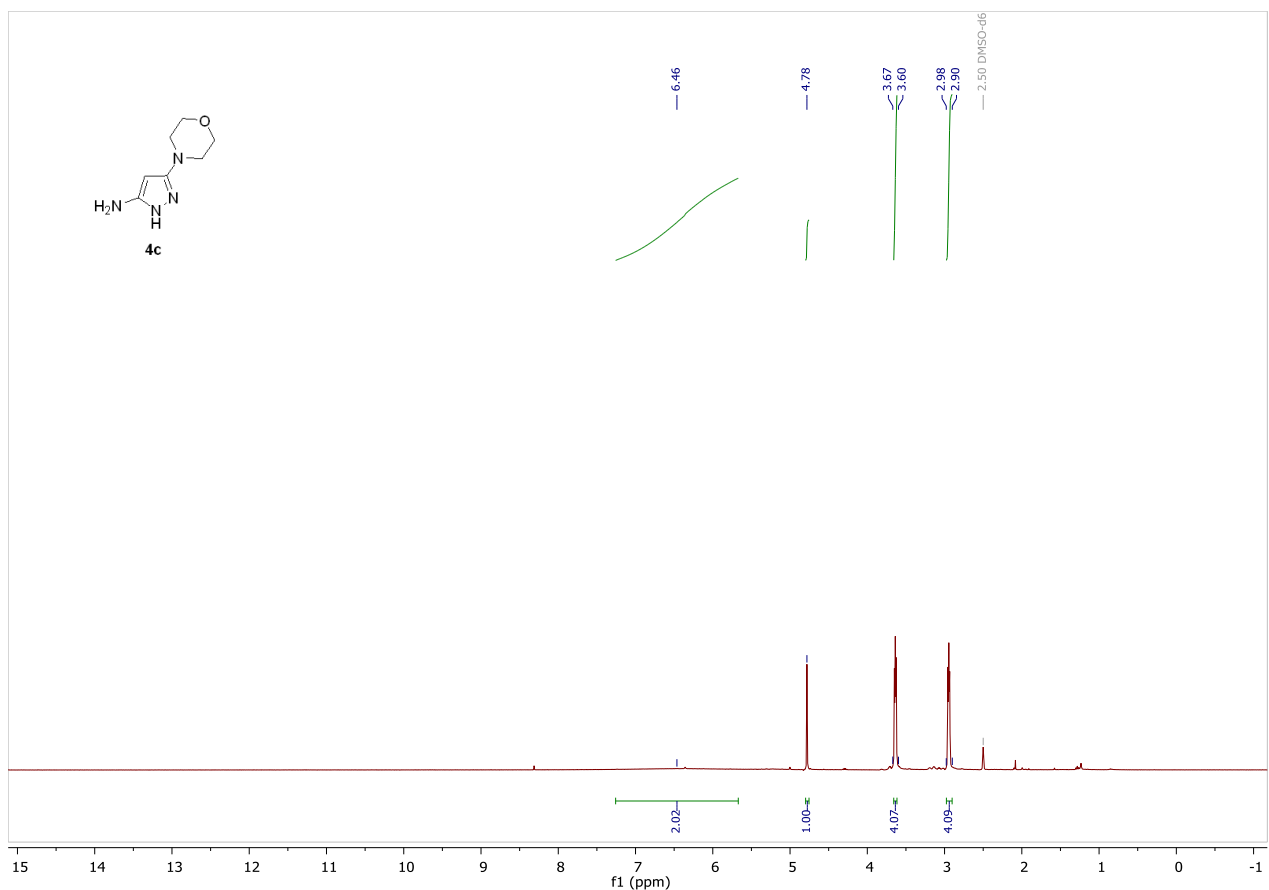

**Figure S10.**  $^1\text{H}$  NMR spectrum ( $\text{CDCl}_3$ ) of **4c**.

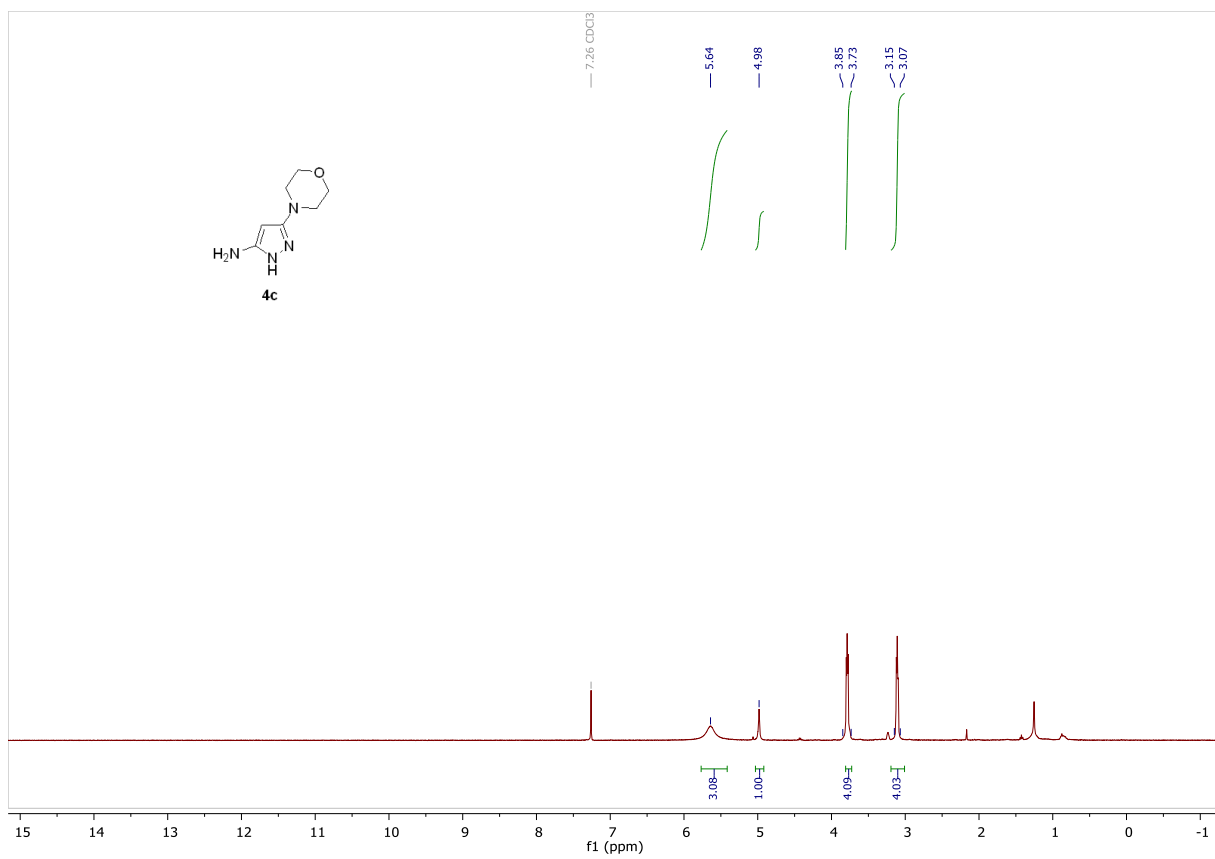

**Figure S11.**  $^{13}\text{C}$  NMR spectrum (DMSO- $d_6$ ) of **4c**.

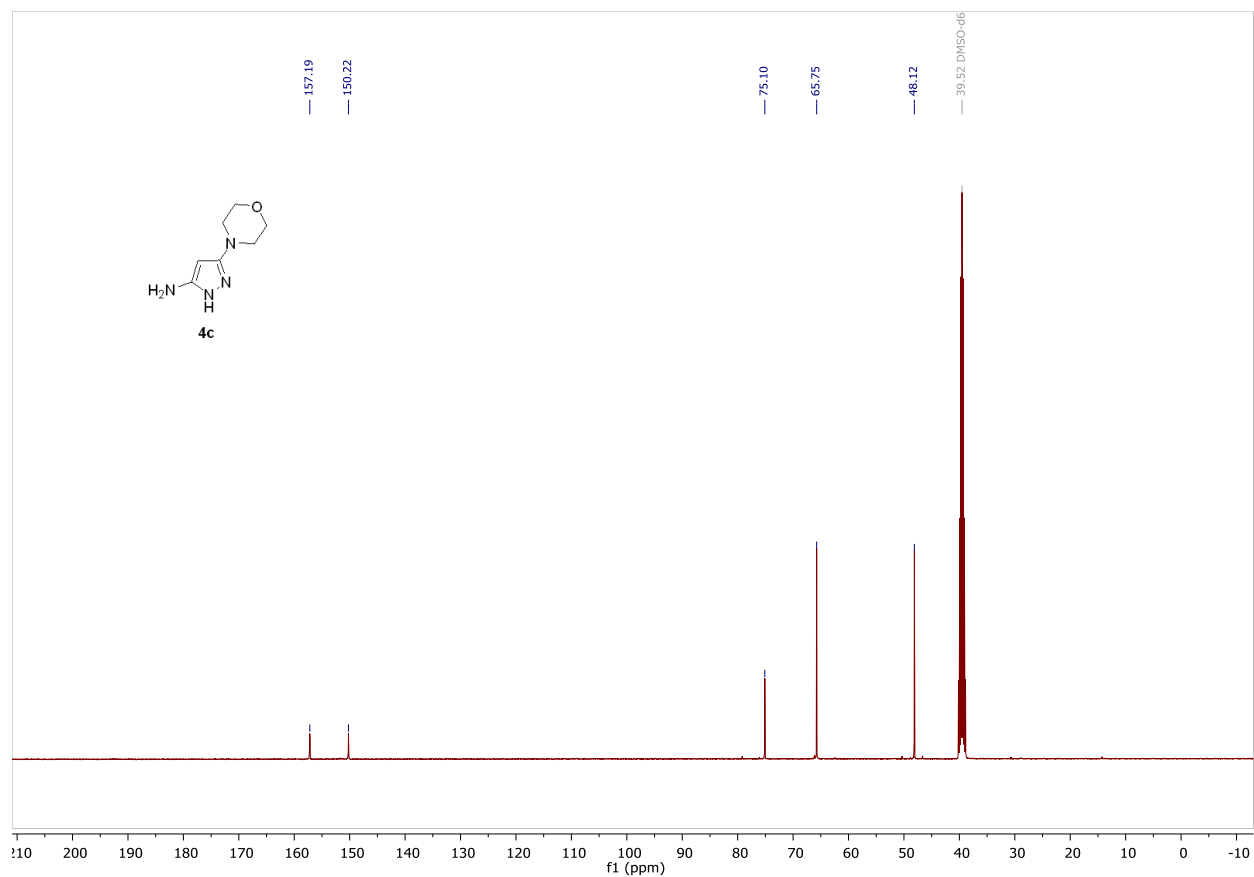



**Figure S12.**  $^1\text{H}$  NMR spectrum (DMSO- $d_6$ ) of **5a**.

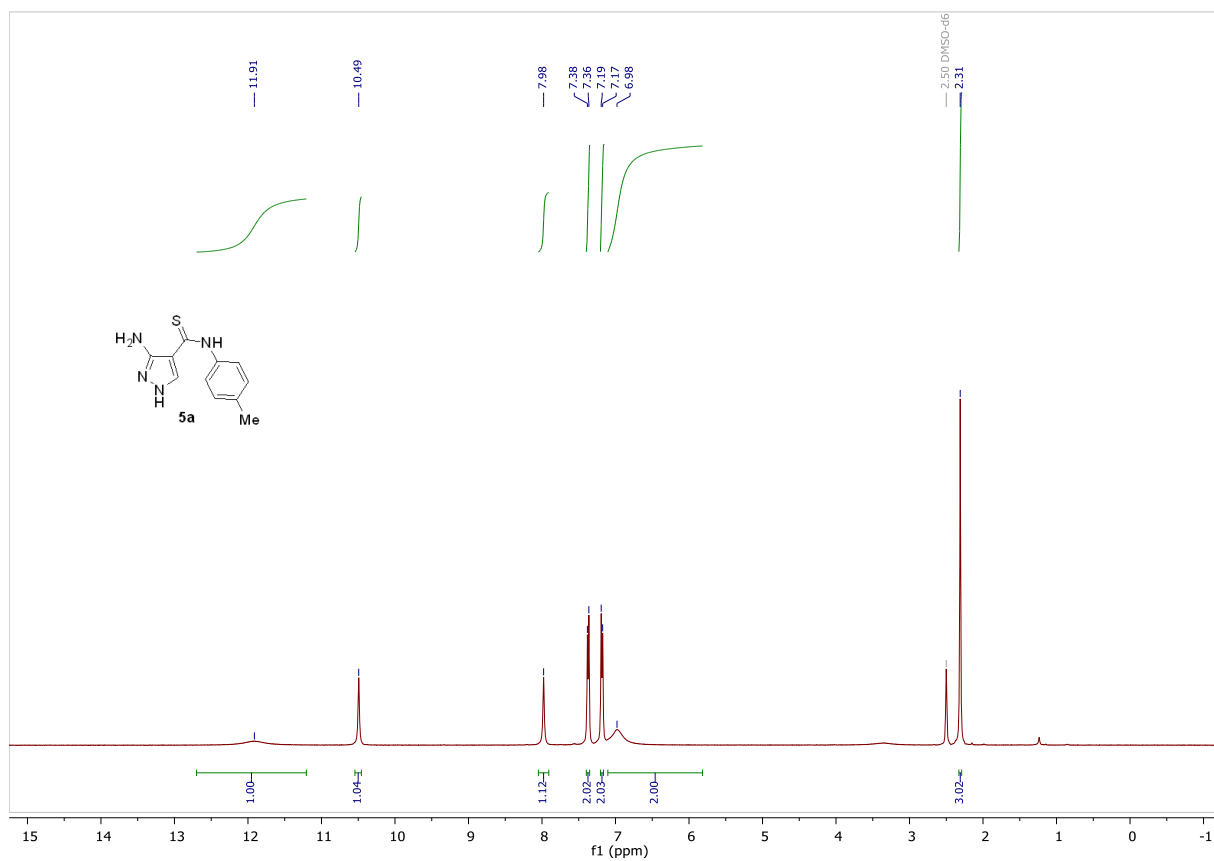

**Figure S13.**  $^{13}\text{C}$  NMR spectrum (DMSO- $d_6$ ) of **5a**.

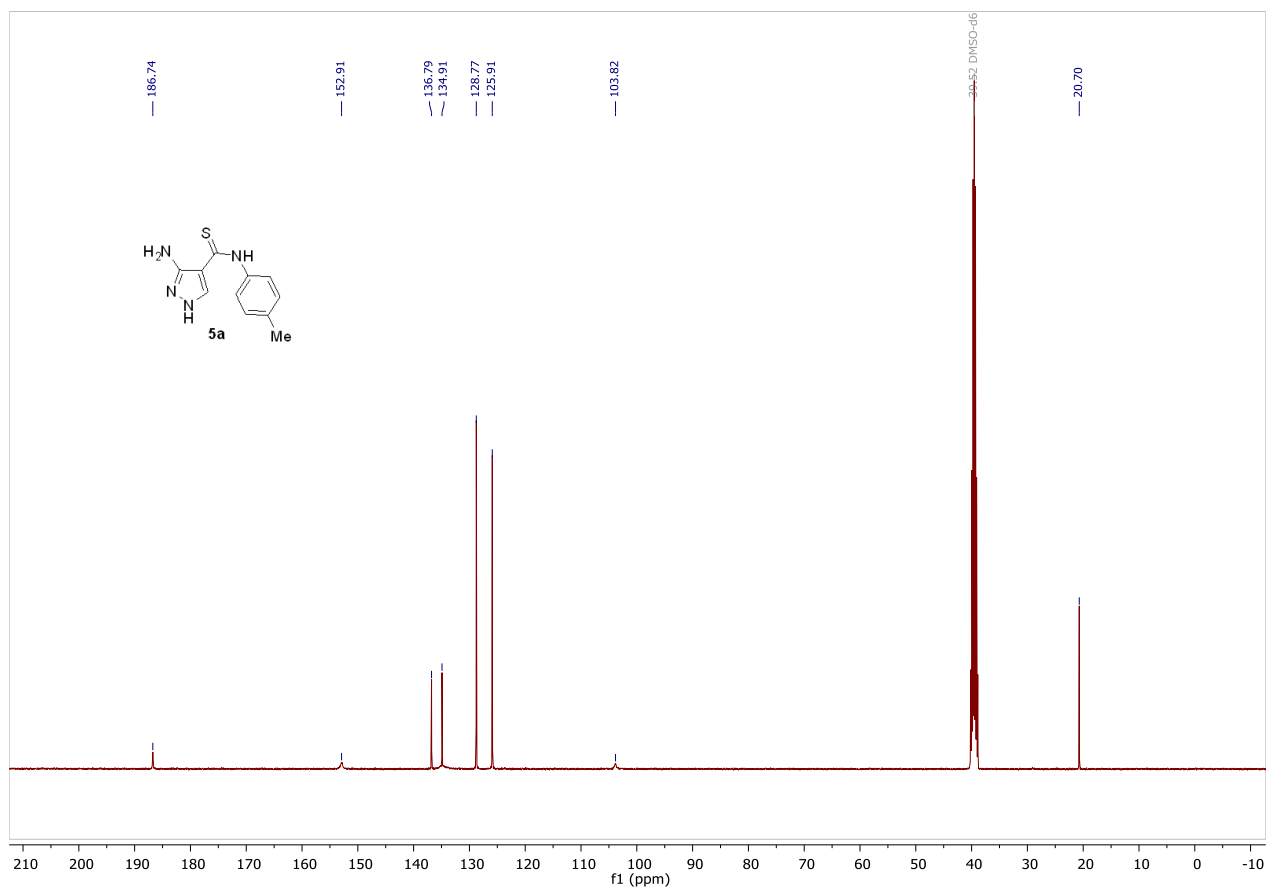

**Figure S14.**  $^1\text{H}$  NMR spectrum (DMSO- $d_6$ ) of **5b**.

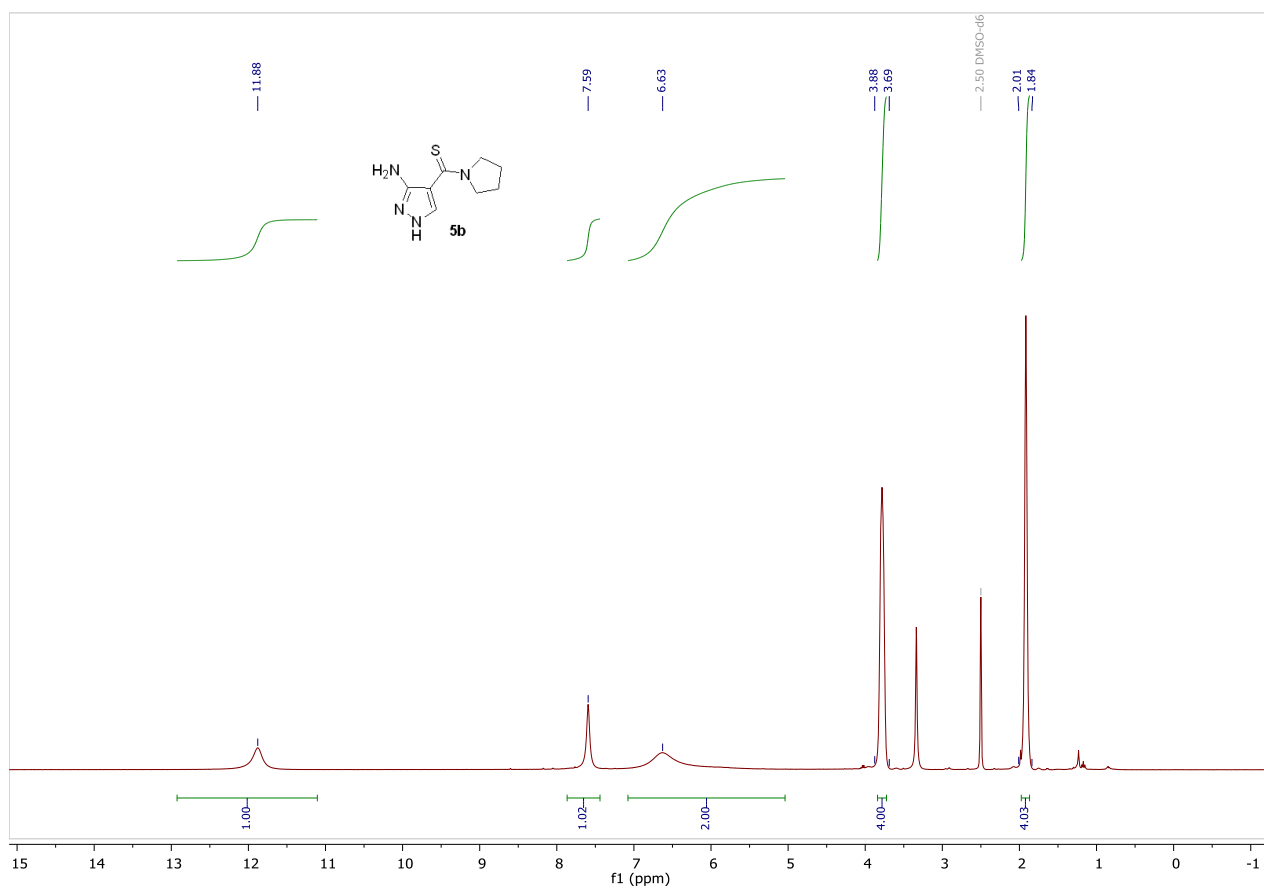

**Figure S15.** <sup>13</sup>C NMR spectrum (DMSO-*d*<sub>6</sub>) of **5b**.

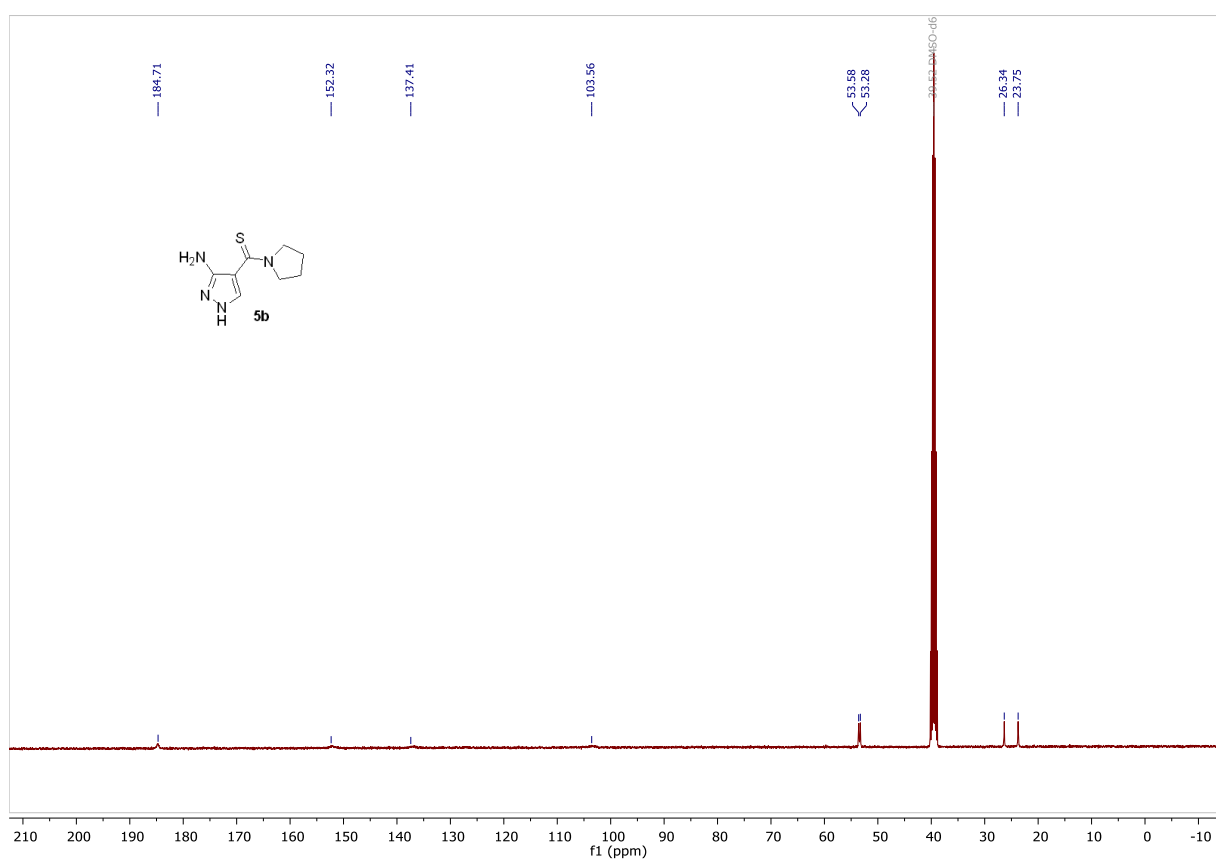

**Figure S16.**  $^1\text{H}$  NMR spectrum ( $\text{DMSO-}d_6$ ) of **5c**.

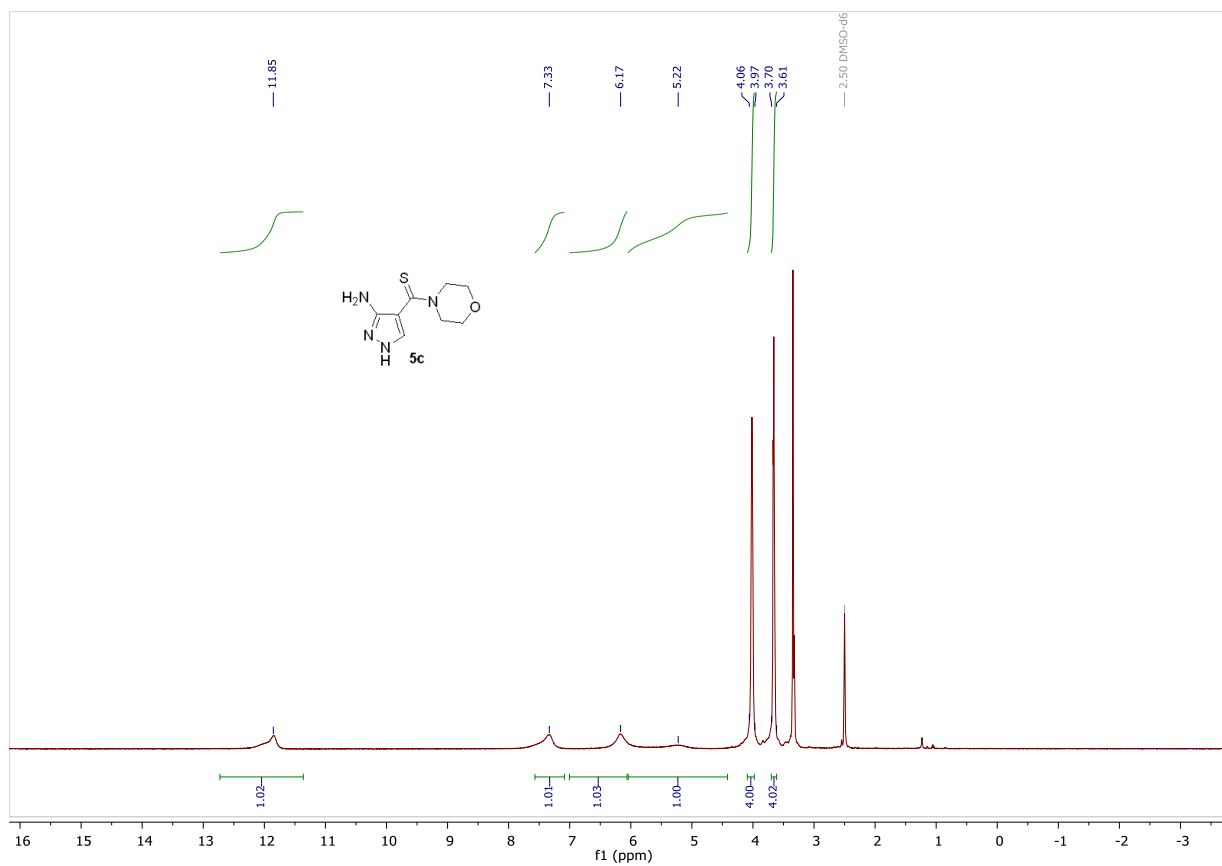

**Figure S17.**  $^{13}\text{C}$  NMR spectrum ( $\text{DMSO-}d_6$ ) of **5c**.

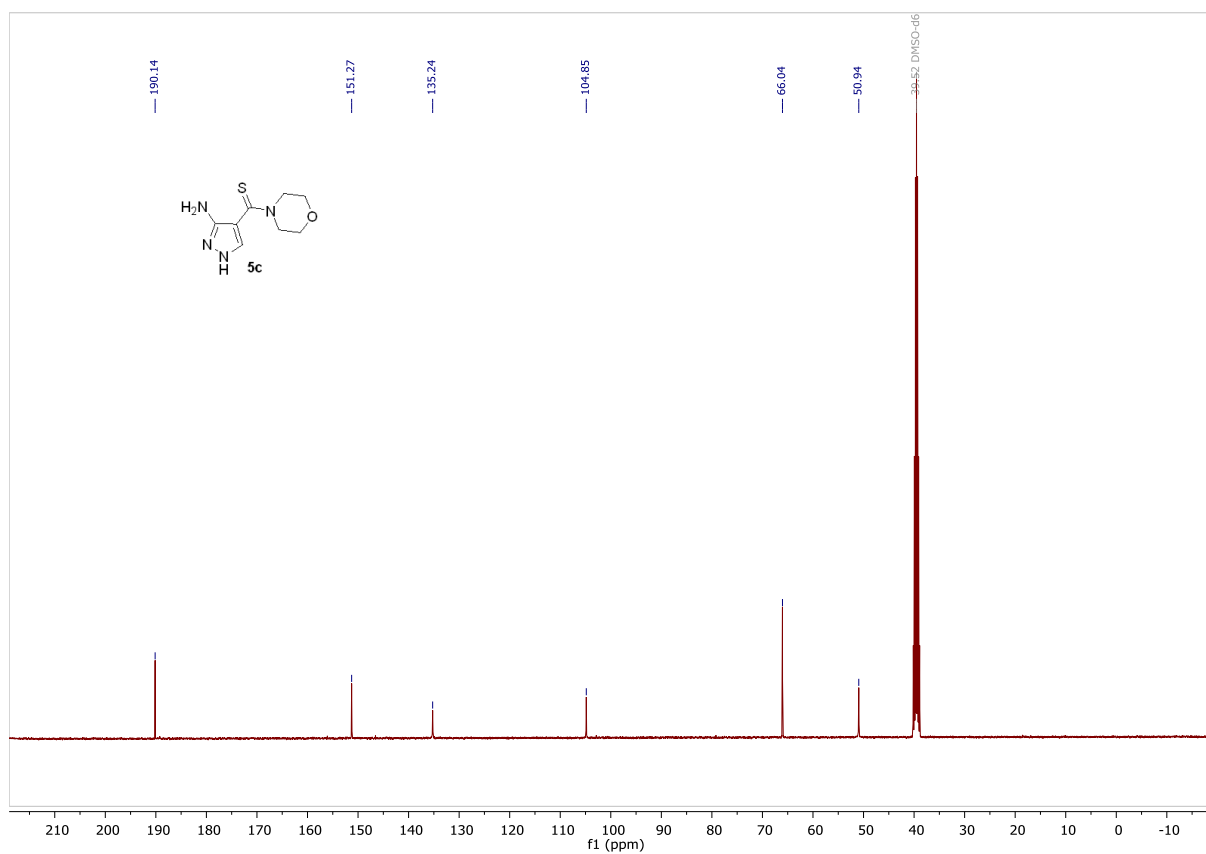

**Figure S18.**  $^1\text{H}$  NMR spectrum ( $\text{DMSO-}d_6$ ) of **5d**.

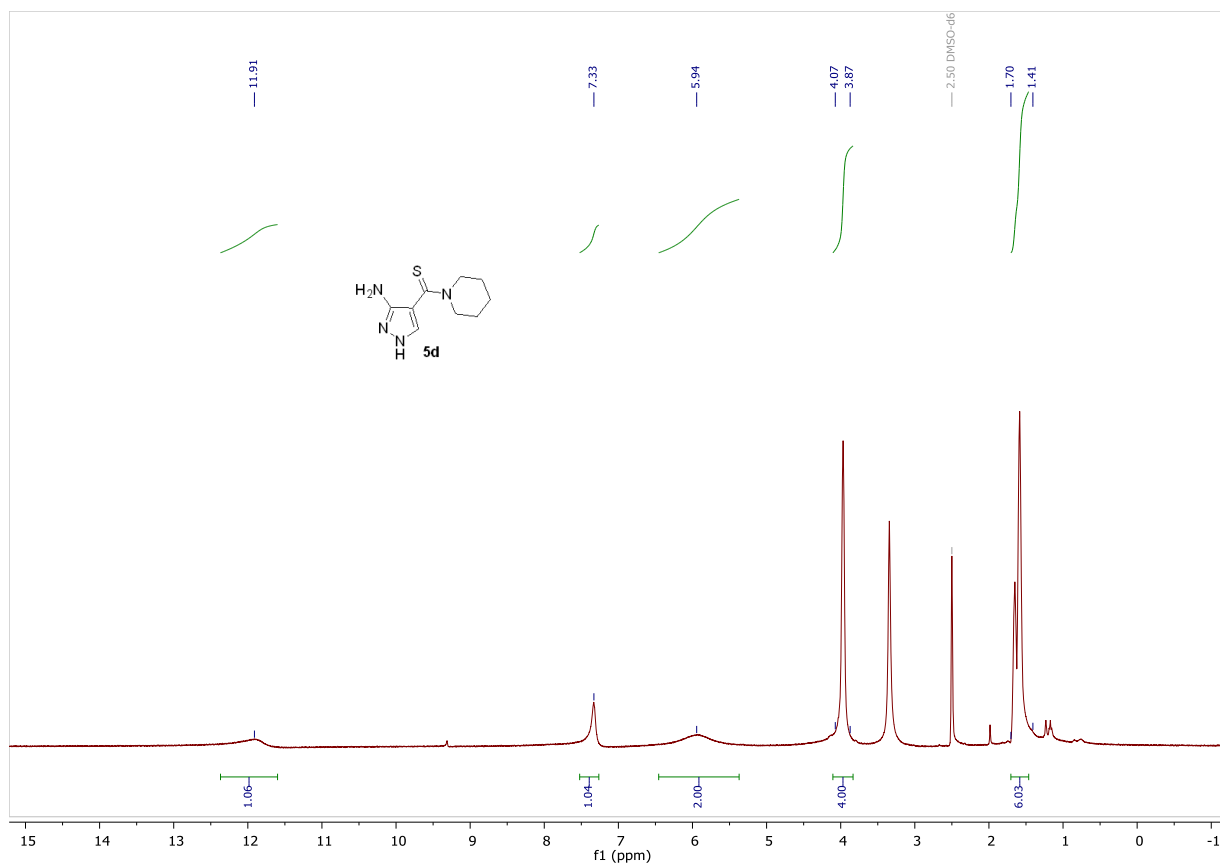

**Figure S19.**  $^{13}\text{C}$  NMR spectrum ( $\text{DMSO-}d_6$ ) of **5d**.

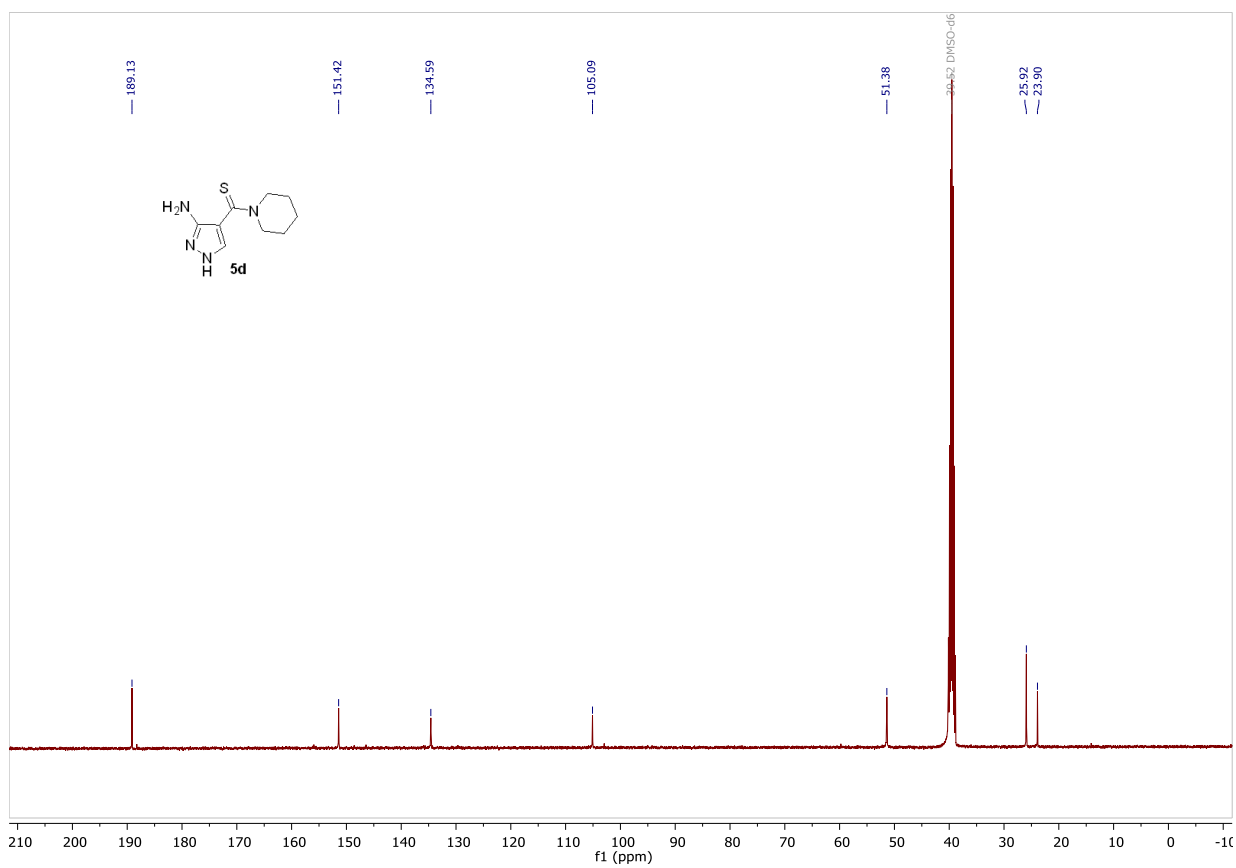

**Figure S20.**  $^1\text{H}$  NMR spectrum ( $\text{DMSO-}d_6$ ) of **5e**.

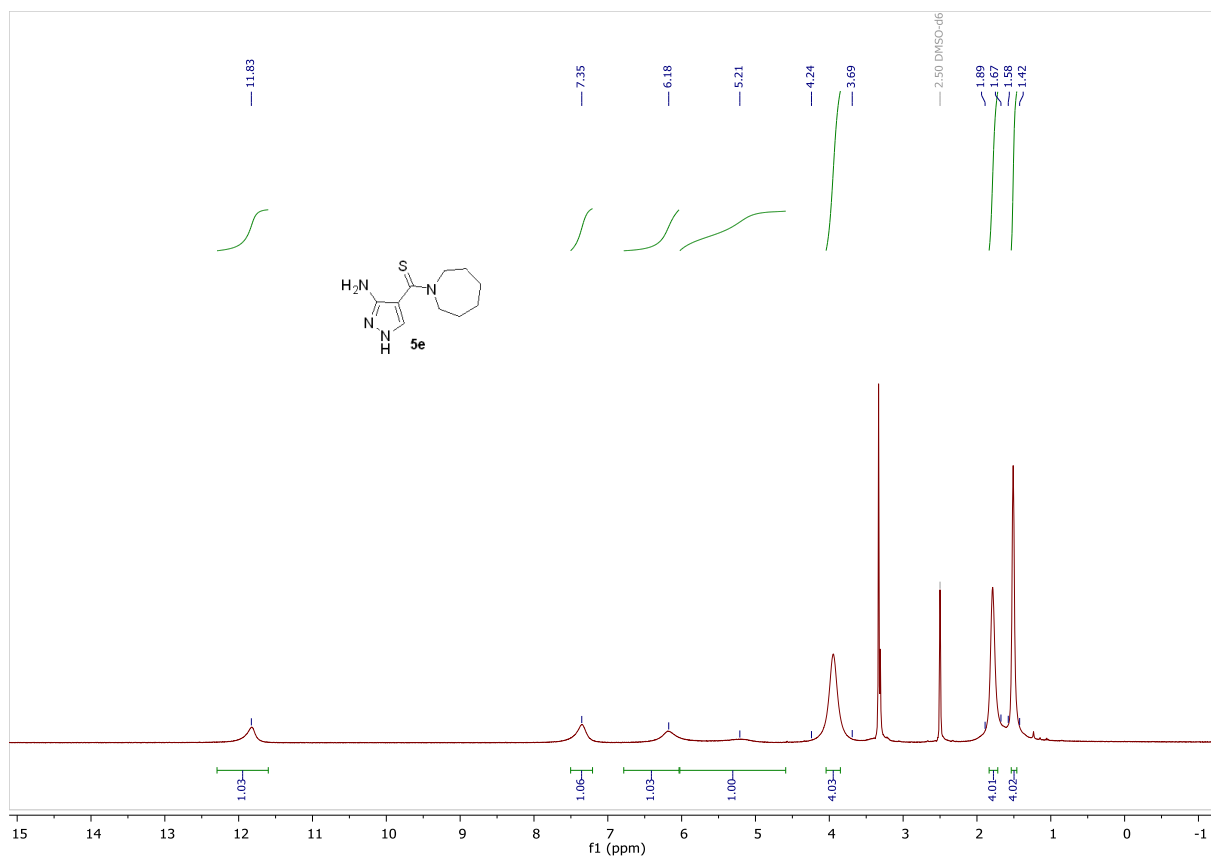

**Figure S21.**  $^{13}\text{C}$  NMR spectrum ( $\text{DMSO-}d_6$ ) of **5e**.

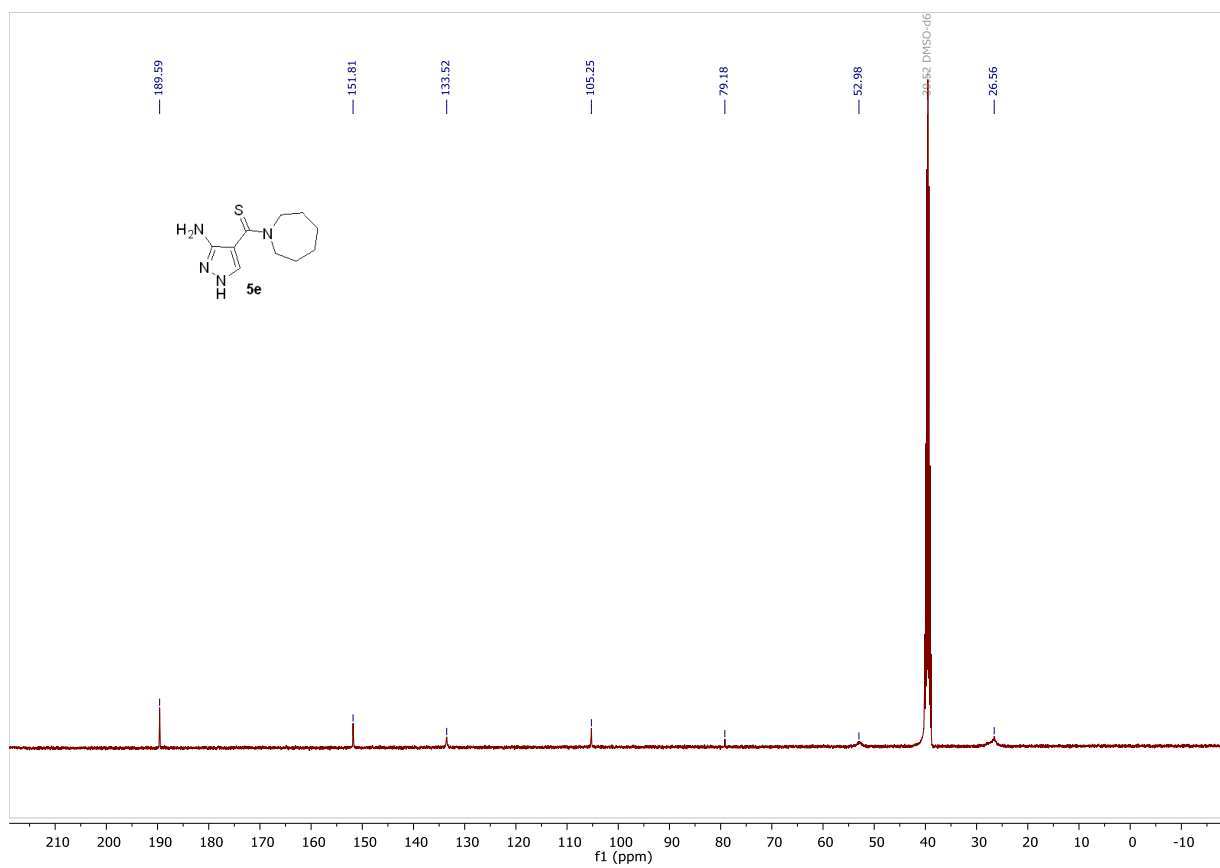

Figure S22.  $^1\text{H}$  NMR spectrum (DMSO- $d_6$ ) of **6a**.

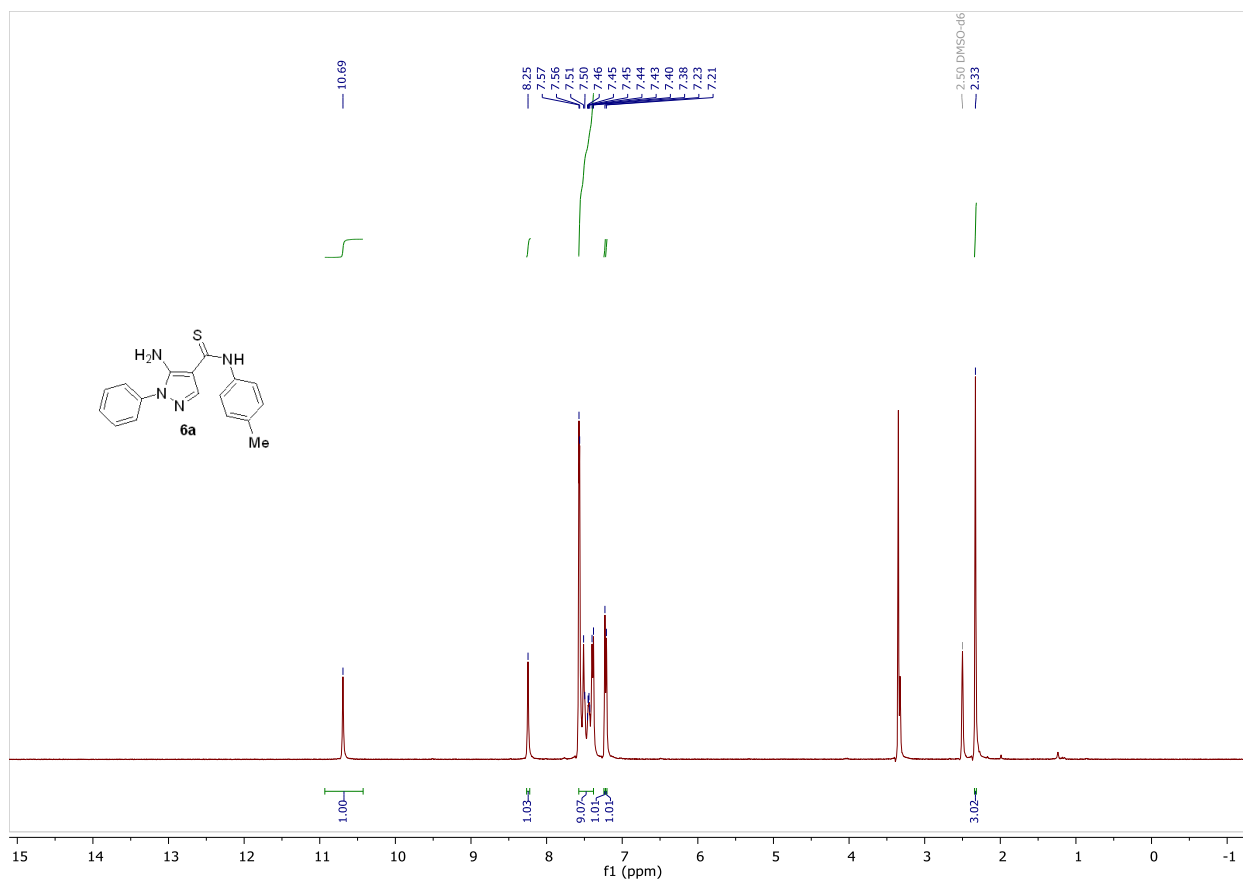

Figure S23.  $^{13}\text{C}$  NMR spectrum (DMSO- $d_6$ ) of **6a**.

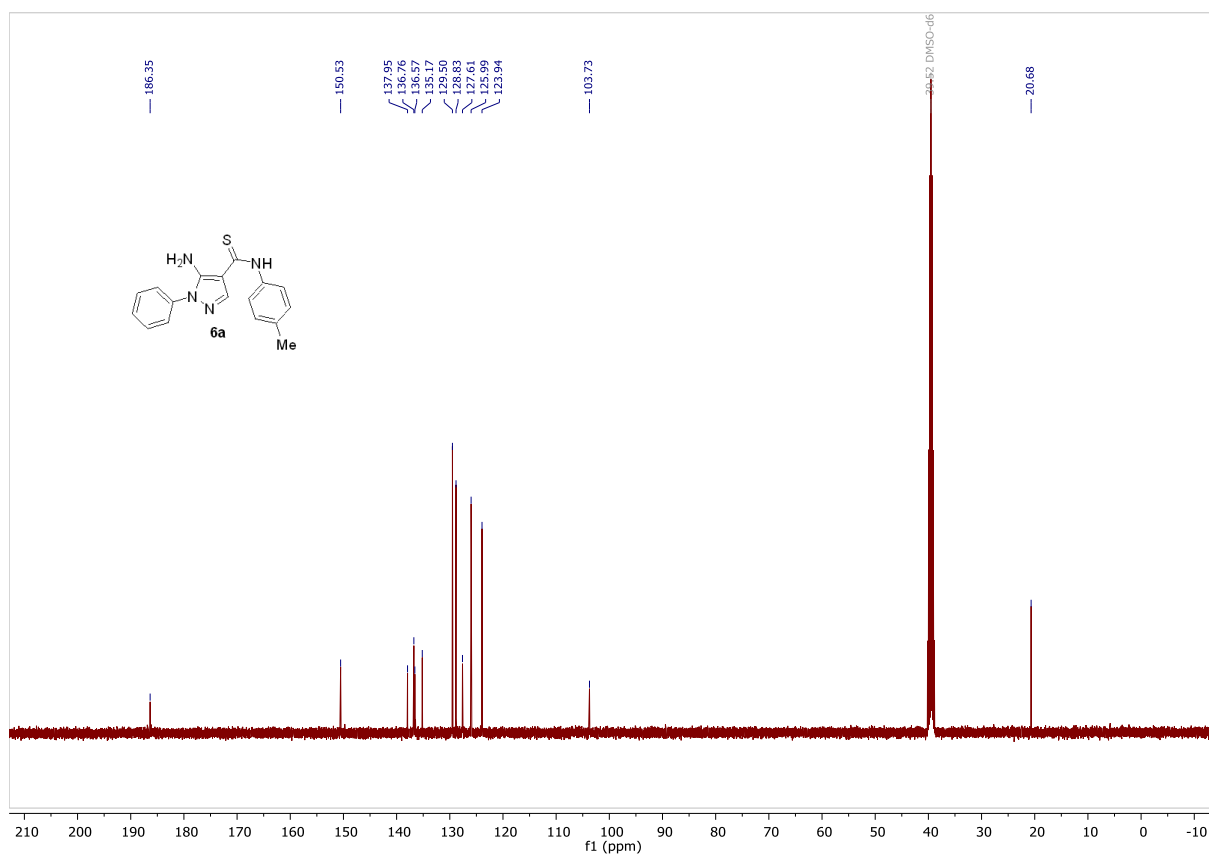

Figure S24.  $^1\text{H}$  NMR spectrum (DMSO- $d_6$ ) of **6b**.

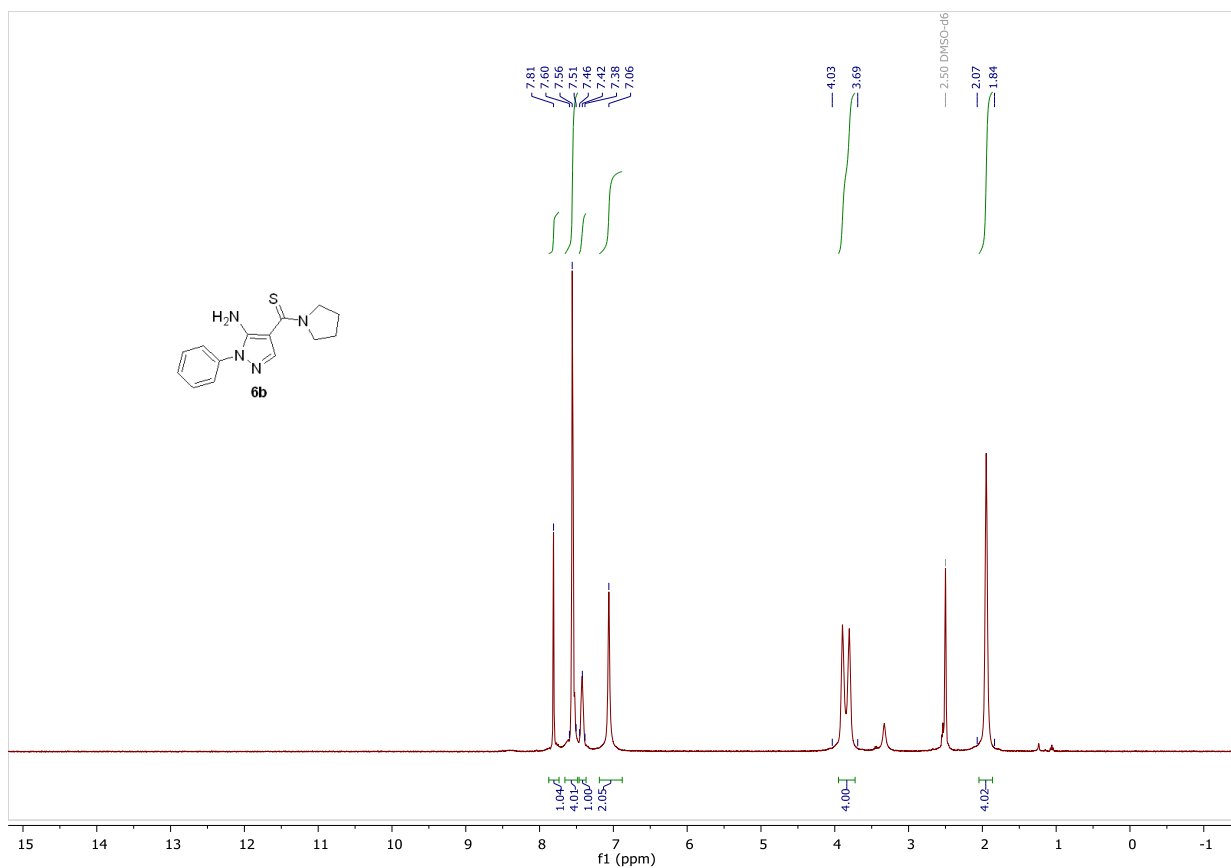

Figure S25.  $^{13}\text{C}$  NMR spectrum (DMSO- $d_6$ ) of **6b**.

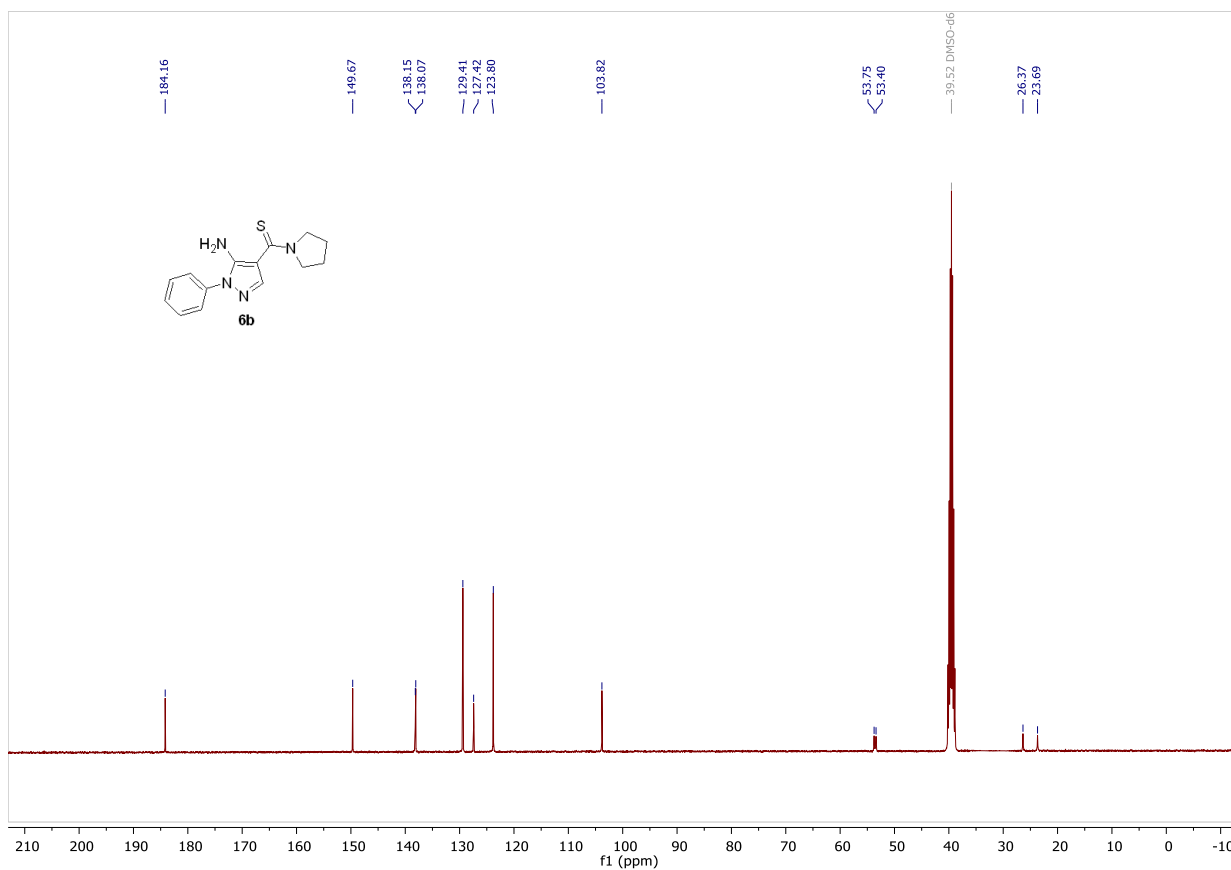

Figure S26.  $^1\text{H}$  NMR spectrum (DMSO- $d_6$ ) of **6c**.

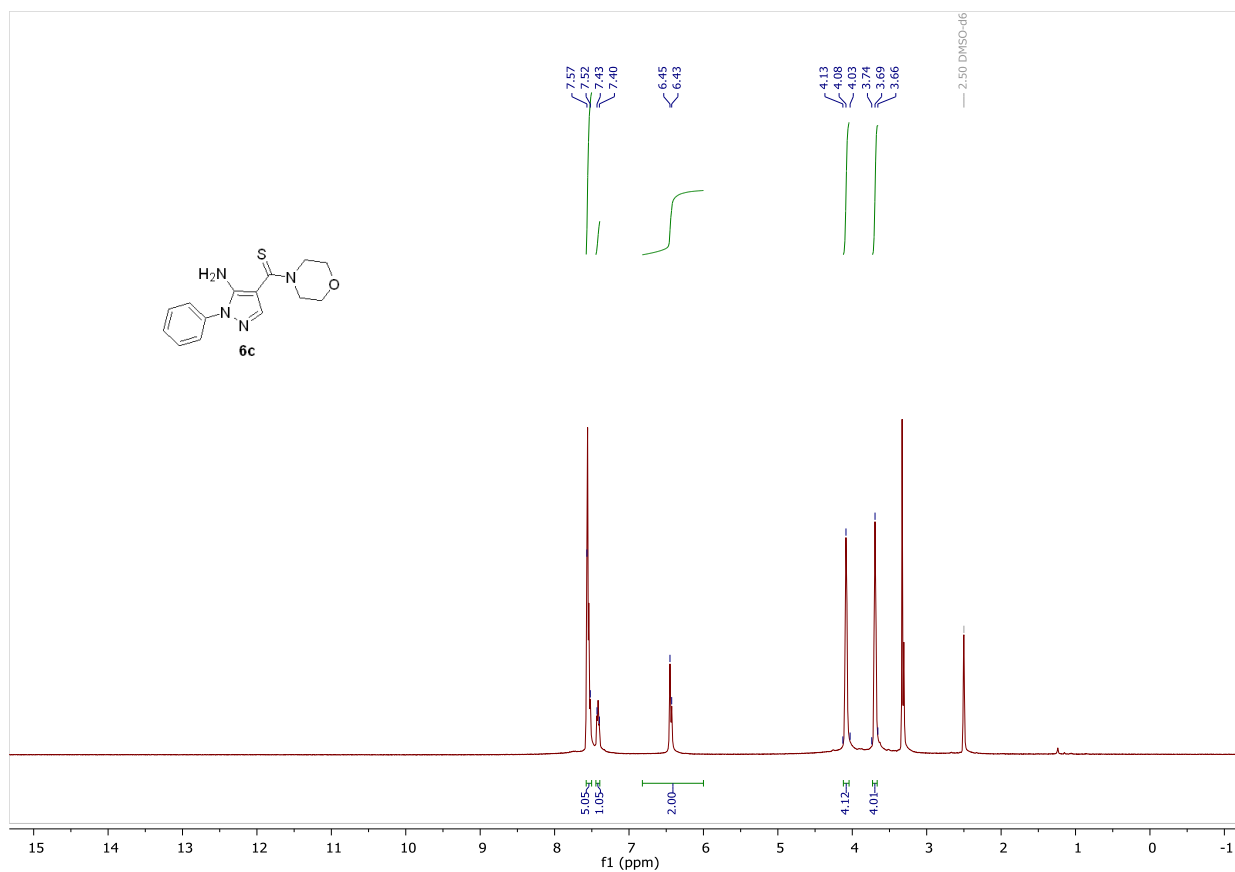

Figure S27.  $^{13}\text{C}$  NMR spectrum (DMSO- $d_6$ ) of **6c**.

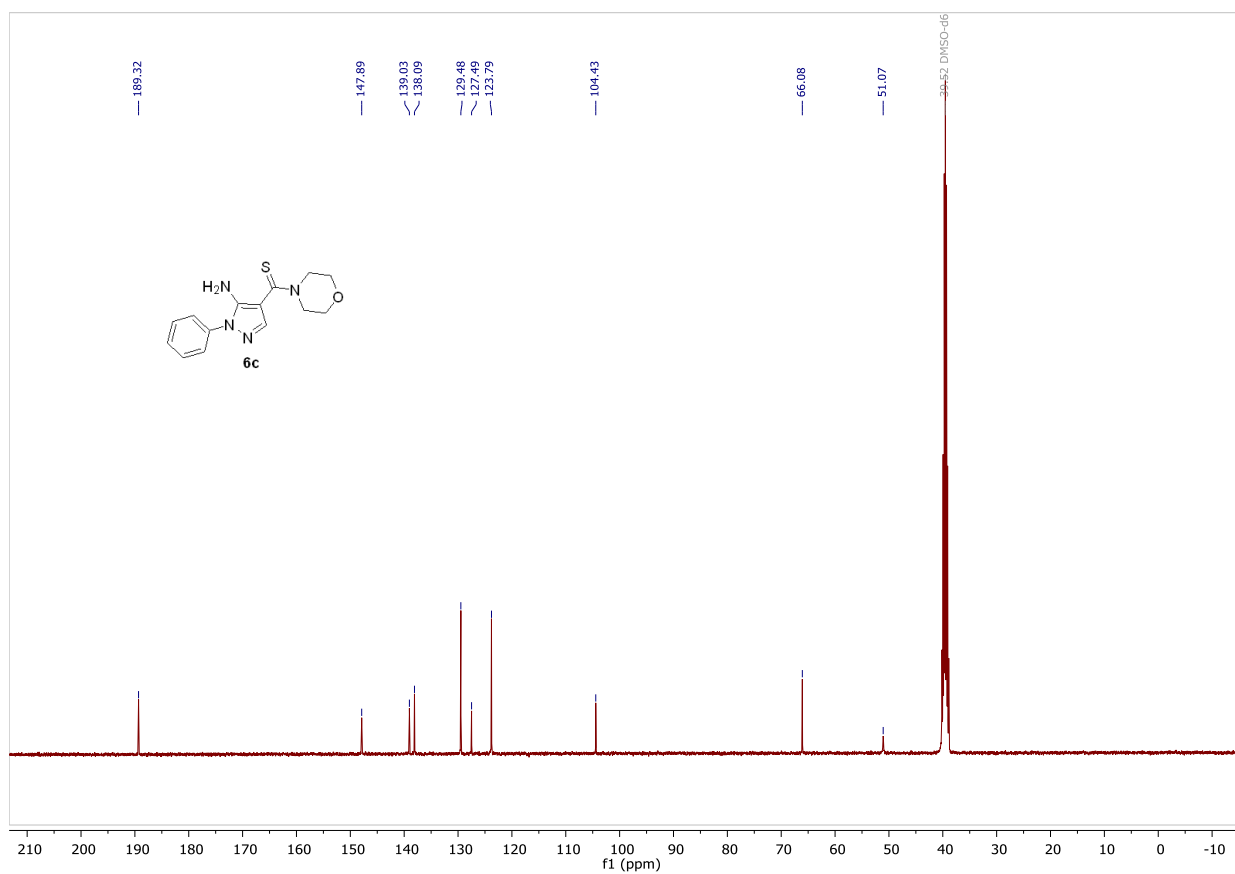



**Figure S28.**  $^1\text{H}$  NMR spectrum ( $\text{DMSO-}d_6$ ) of **6d**.

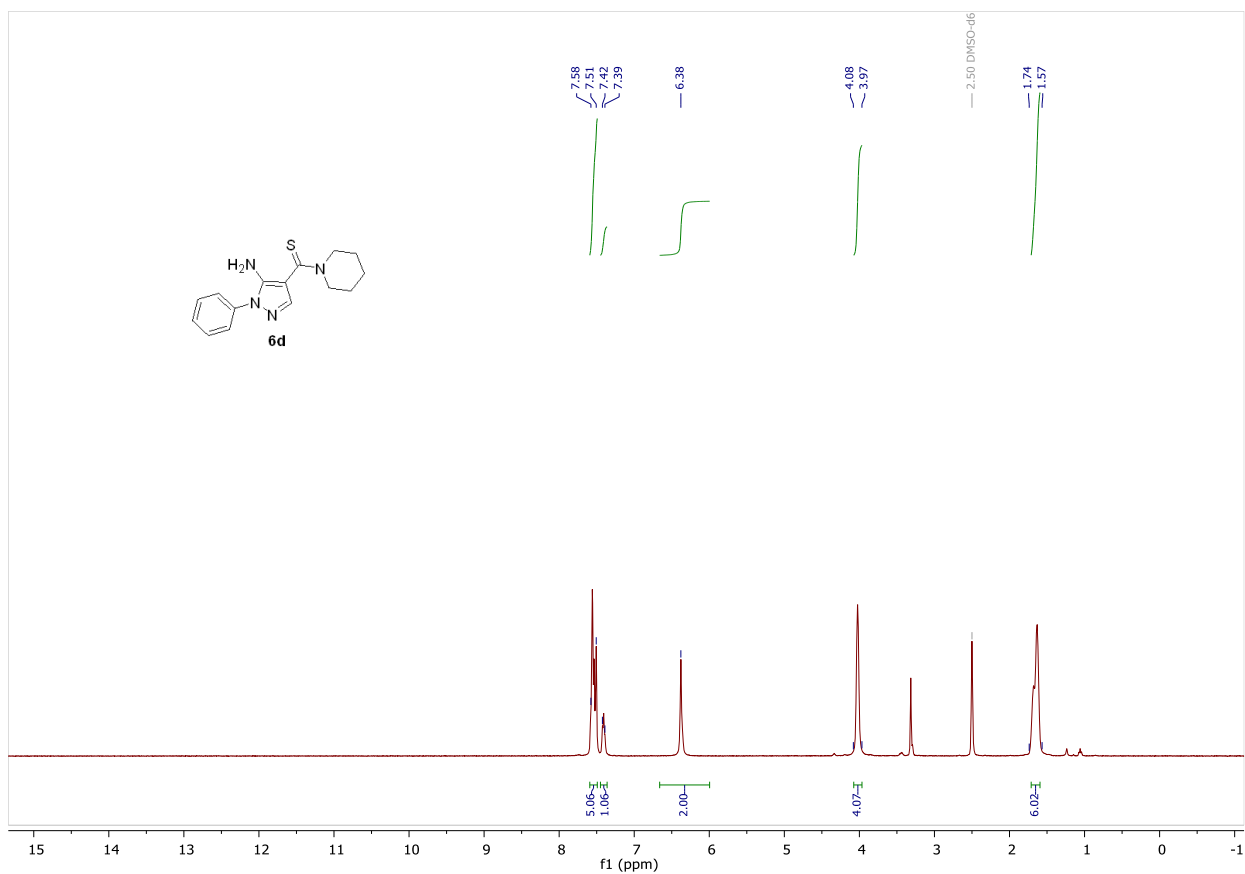

**Figure S29.**  $^{13}\text{C}$  NMR spectrum ( $\text{DMSO-}d_6$ ) of **6d**.

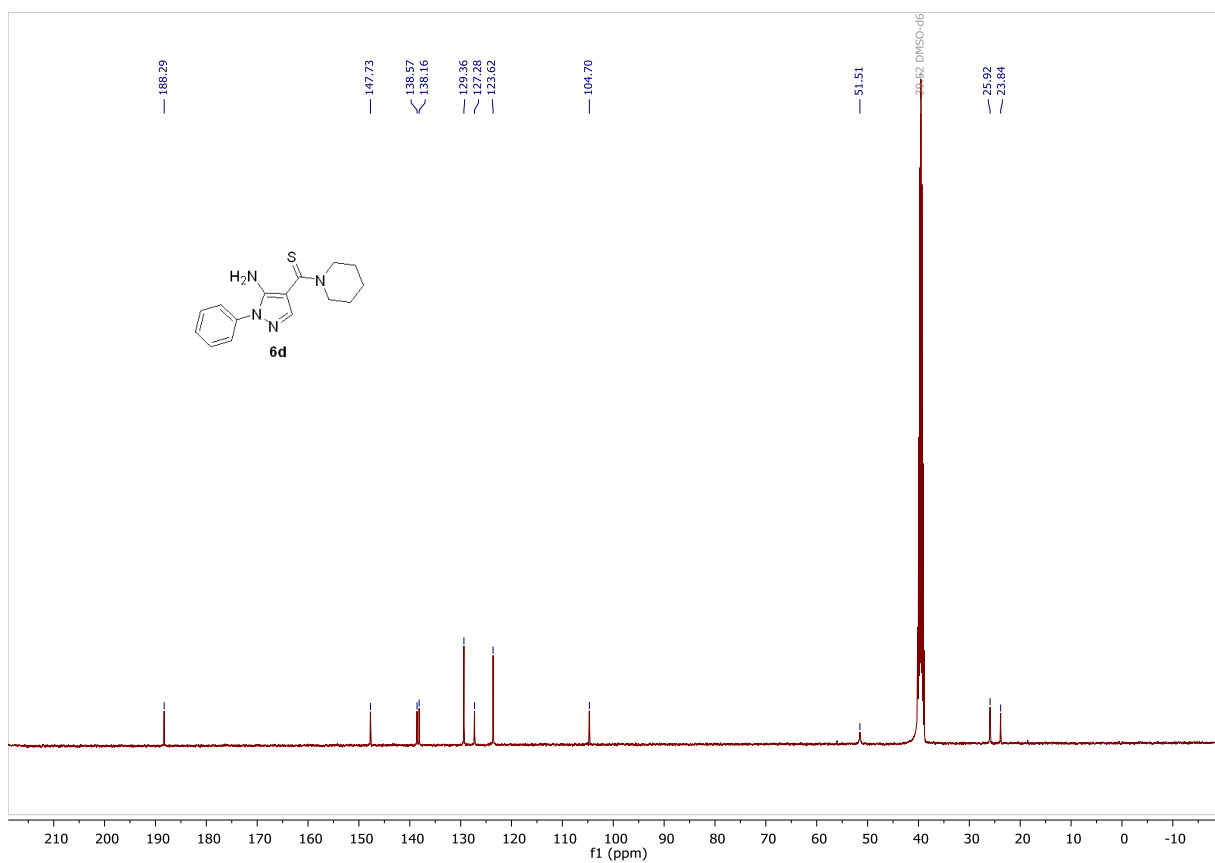

Figure S30.  $^1\text{H}$  NMR spectrum (DMSO- $d_6$ ) of **6e**.

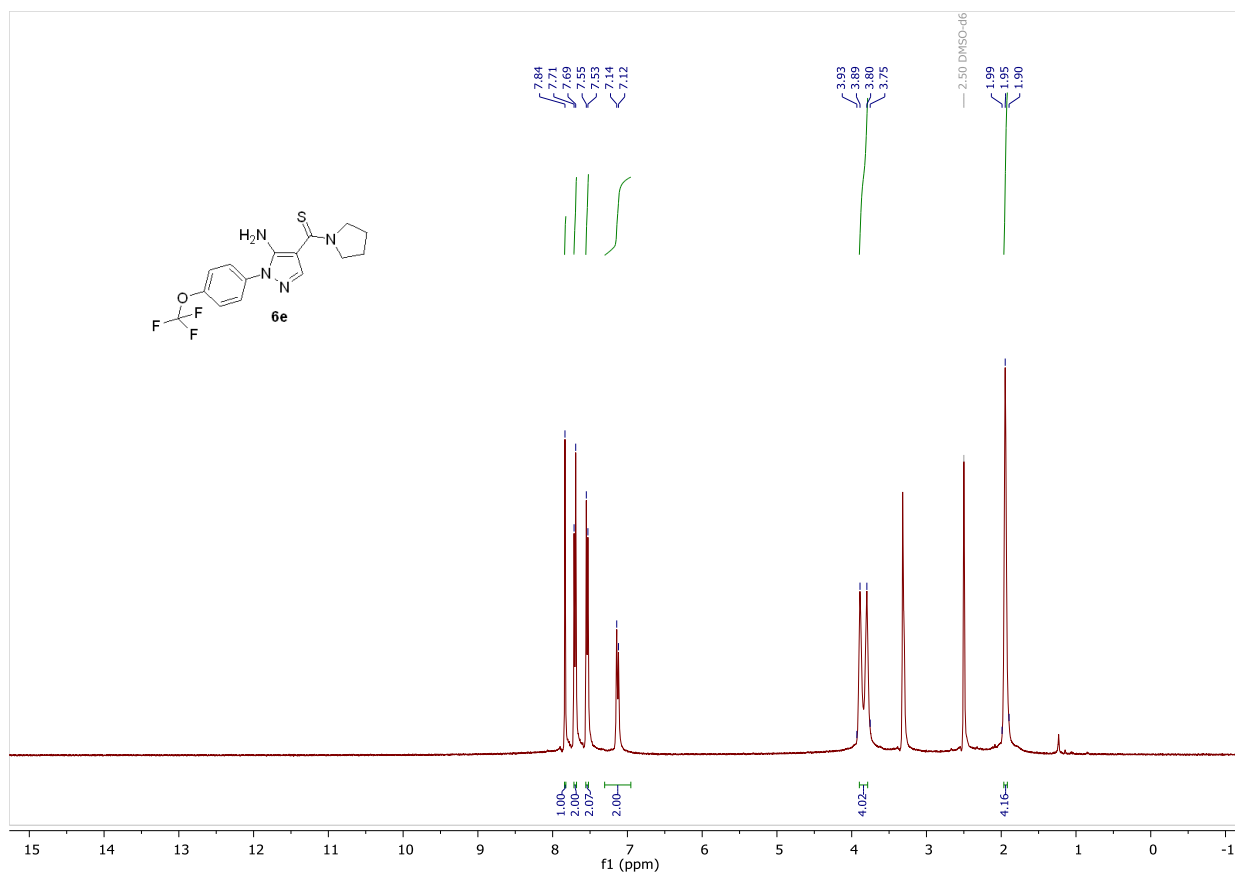

Figure S31.  $^{13}\text{C}$  NMR spectrum (DMSO- $d_6$ ) of **6e**.

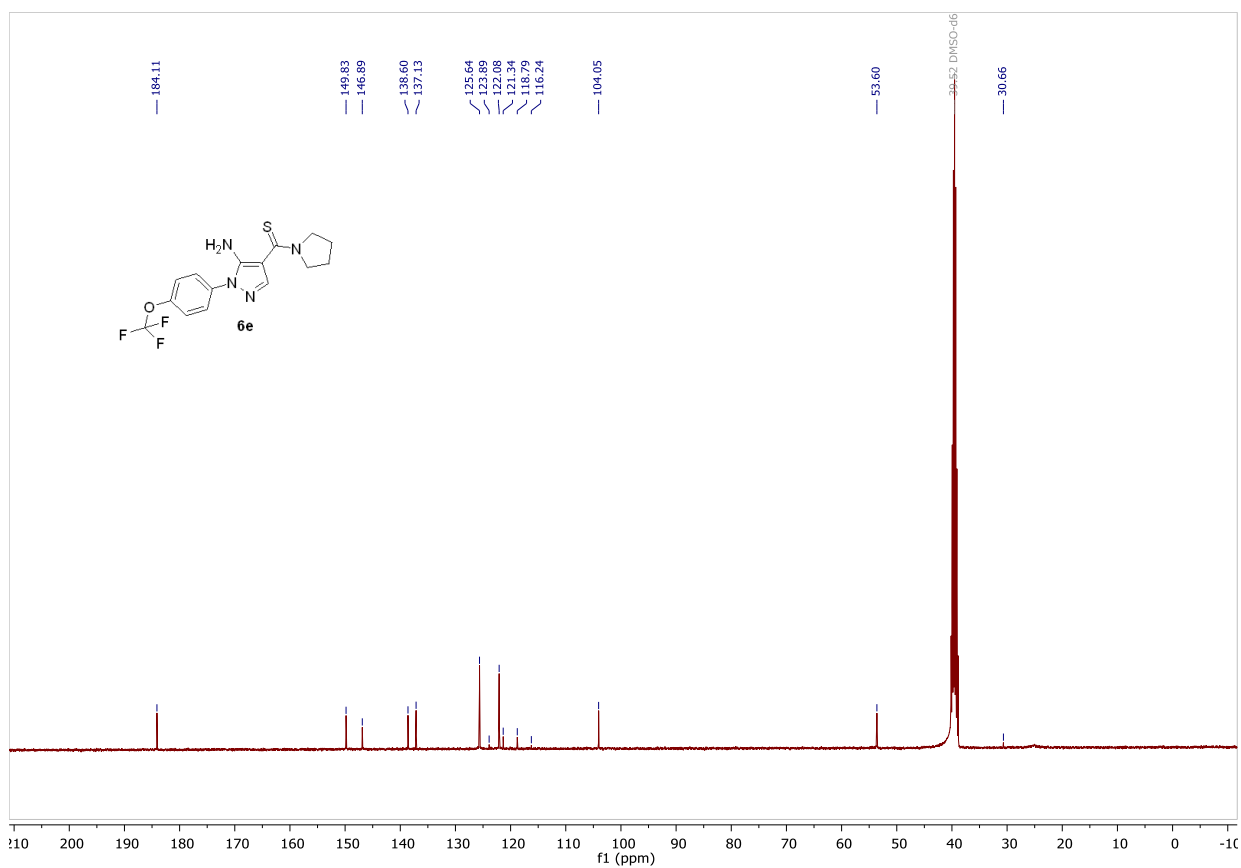

**Figure S32.**  $^{19}\text{F}$  NMR spectrum (DMSO- $d_6$ ) of **6e**.

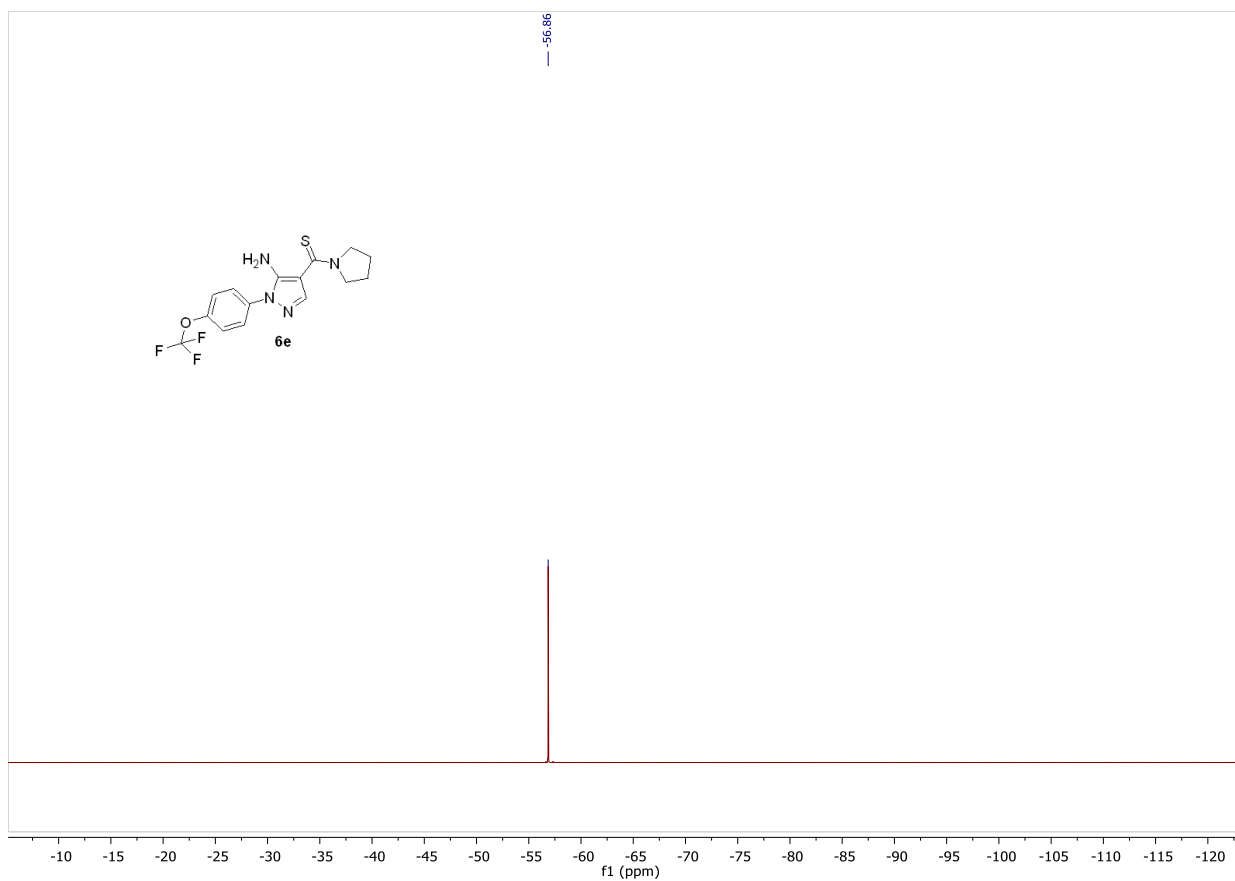

**Figure S33.**  $^1\text{H}$  NMR spectrum (DMSO- $d_6$ ) of **6f**.

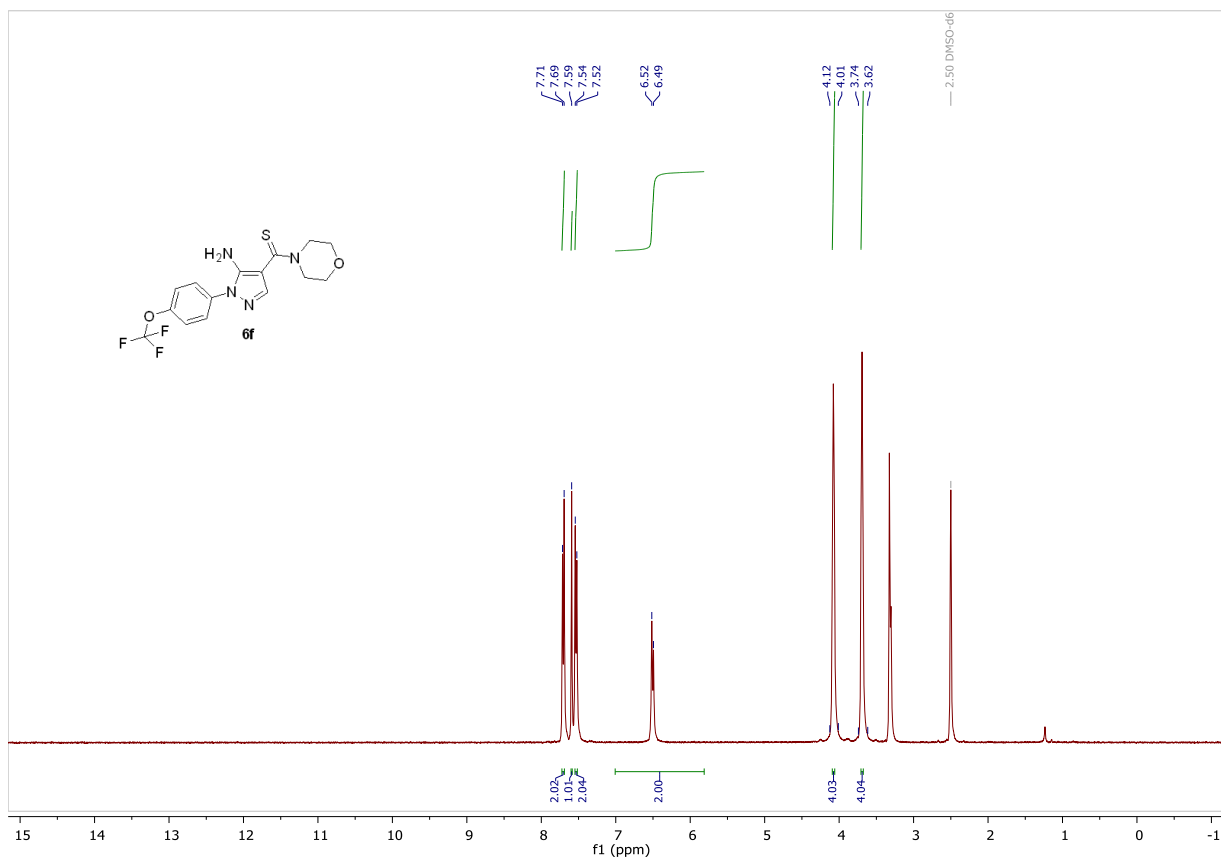

Figure S34.  $^{13}\text{C}$  NMR spectrum (DMSO- $d_6$ ) of **6f**.

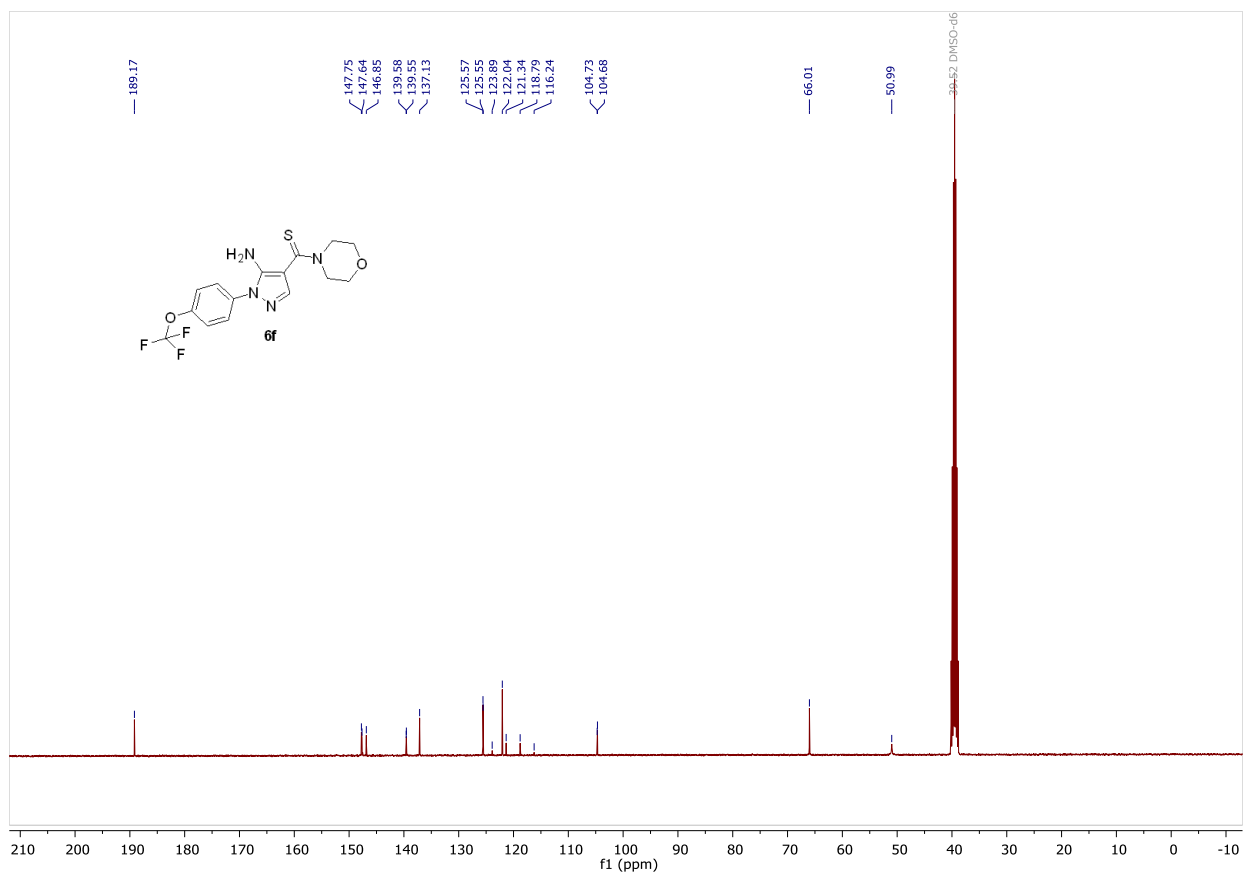

Figure S35.  $^{19}\text{F}$  NMR spectrum (DMSO- $d_6$ ) of **6f**.

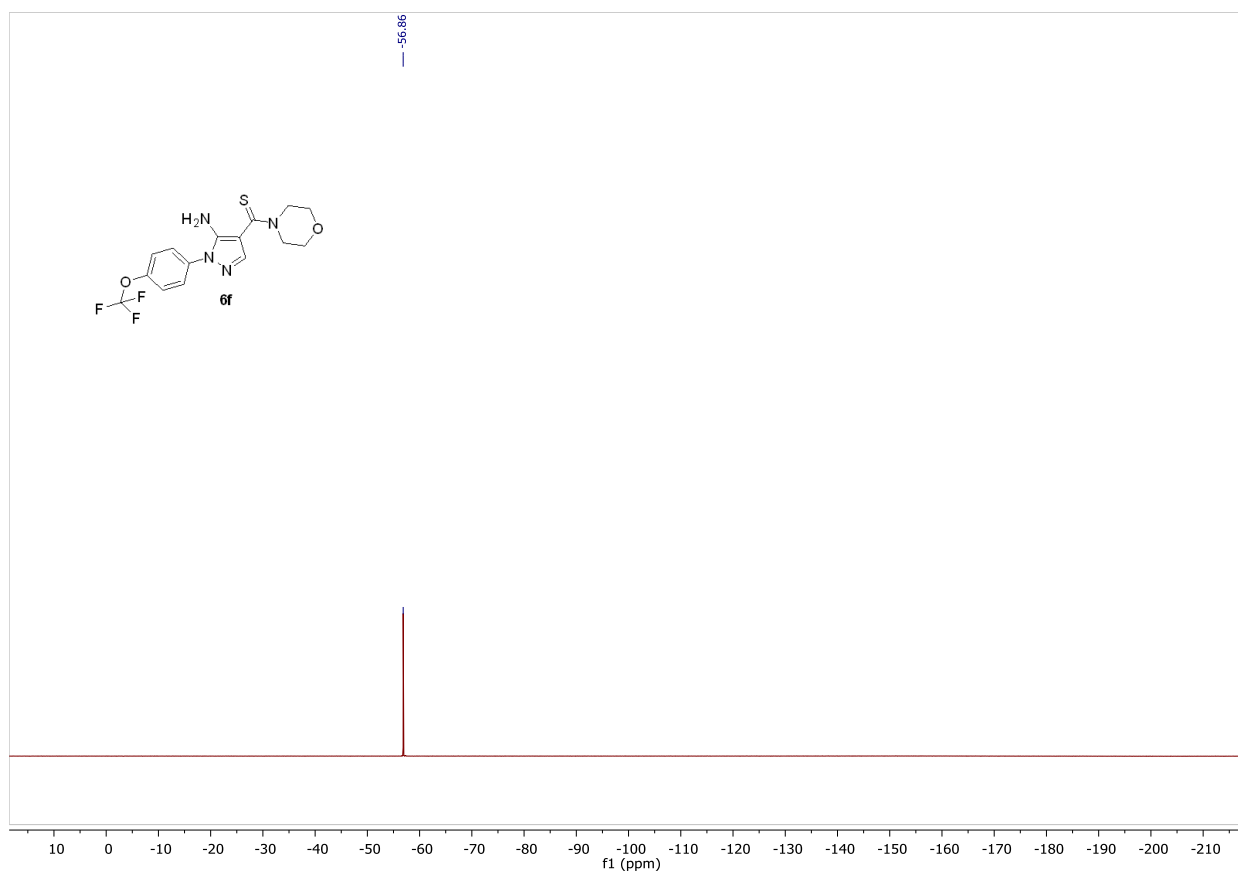

Figure S36.  $^1\text{H}$  NMR spectrum (DMSO- $d_6$ ) of **7a**.

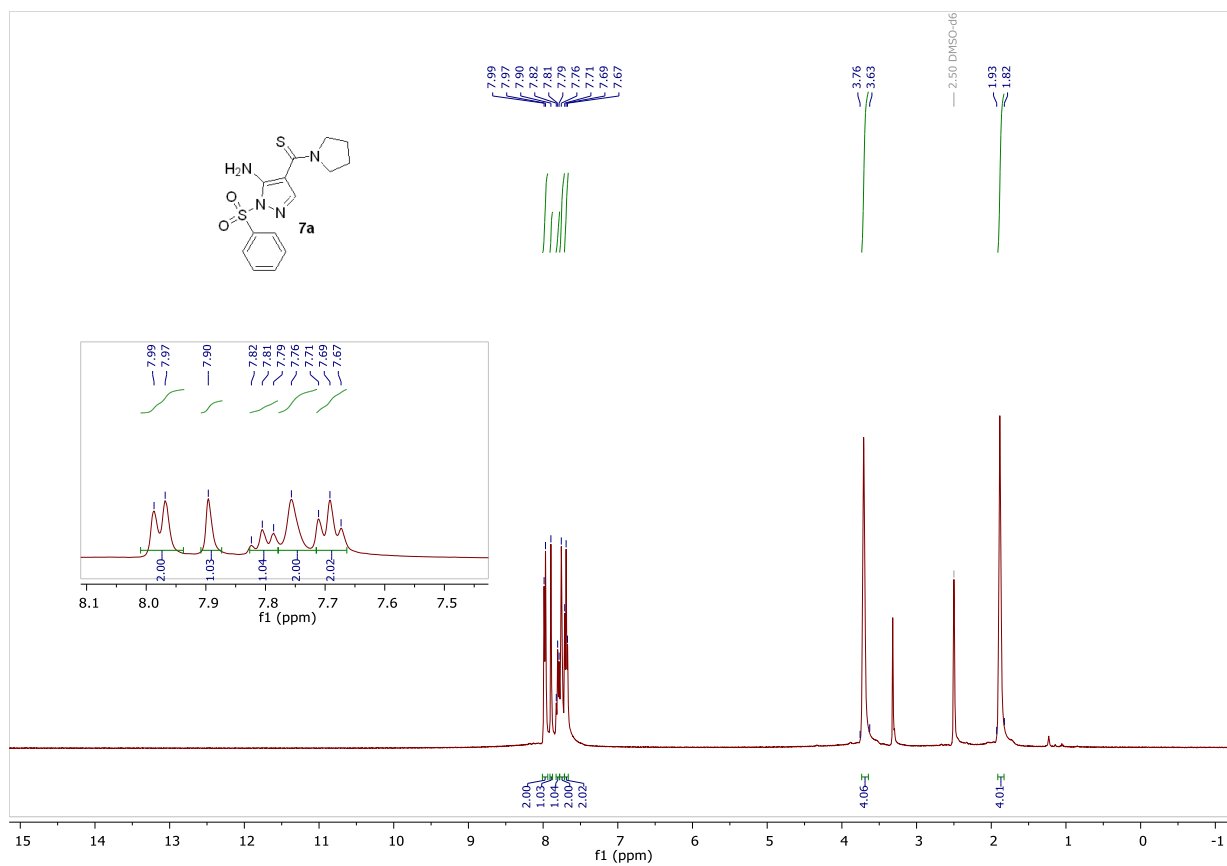

Figure S37.  $^{13}\text{C}$  NMR spectrum (DMSO- $d_6$ ) of **7a**.

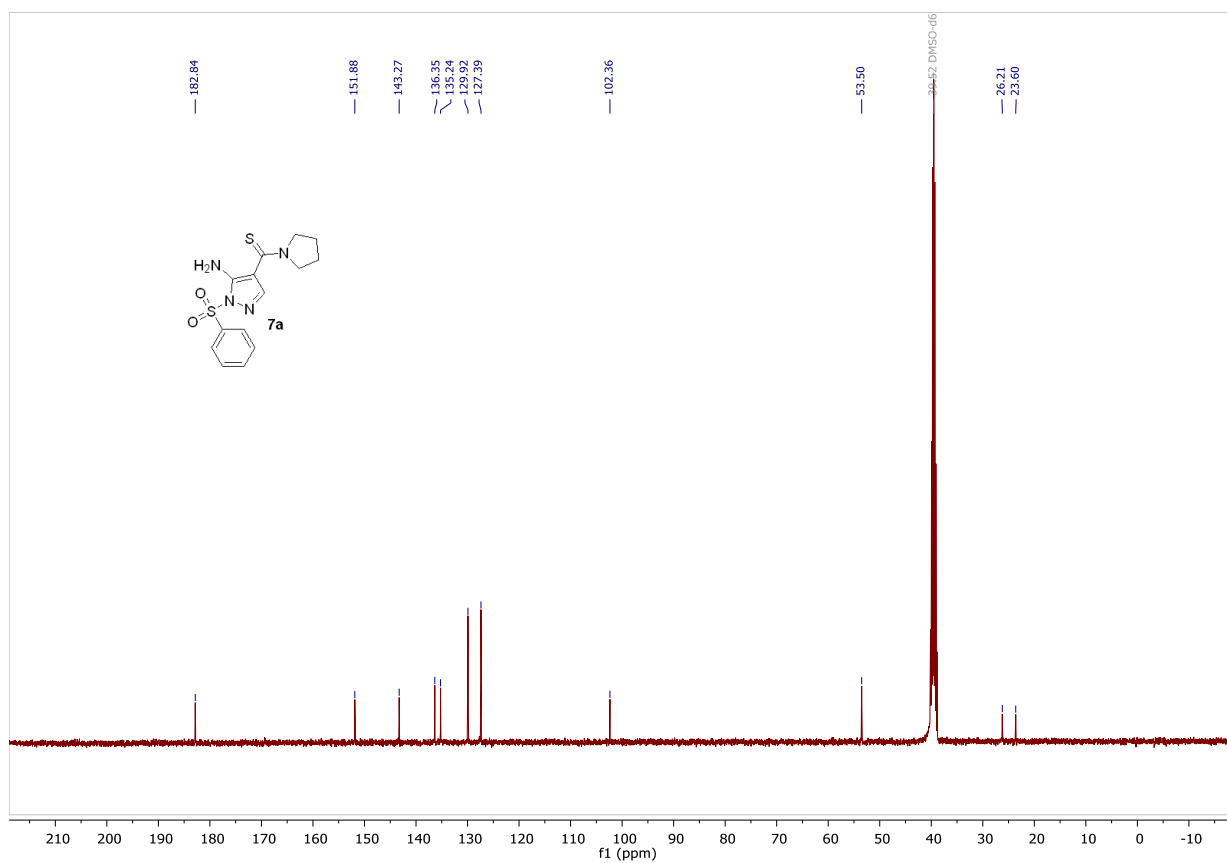

Figure S38.  $^1\text{H}$  NMR spectrum (DMSO- $d_6$ ) of **7b**.

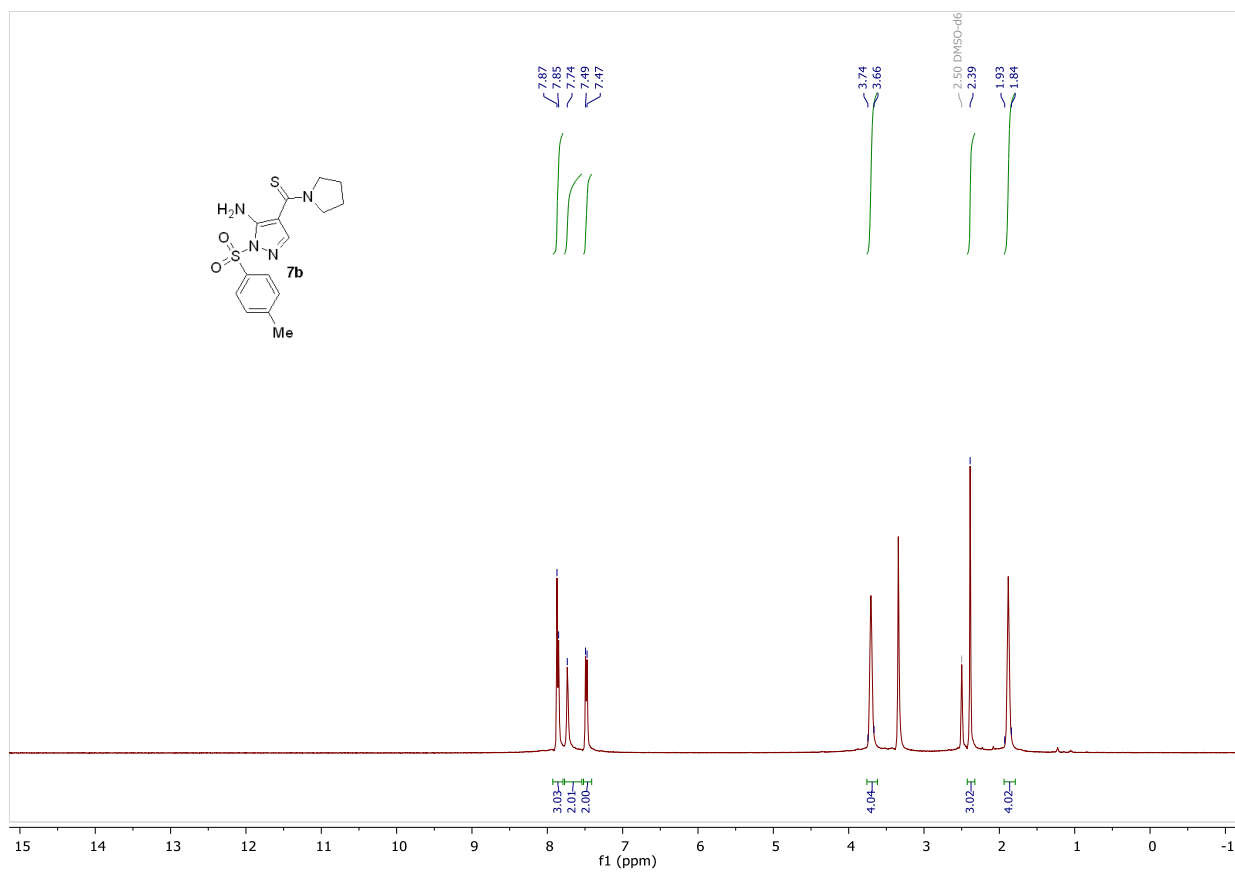

Figure S39.  $^{13}\text{C}$  NMR spectrum (DMSO- $d_6$ ) of **7b**.

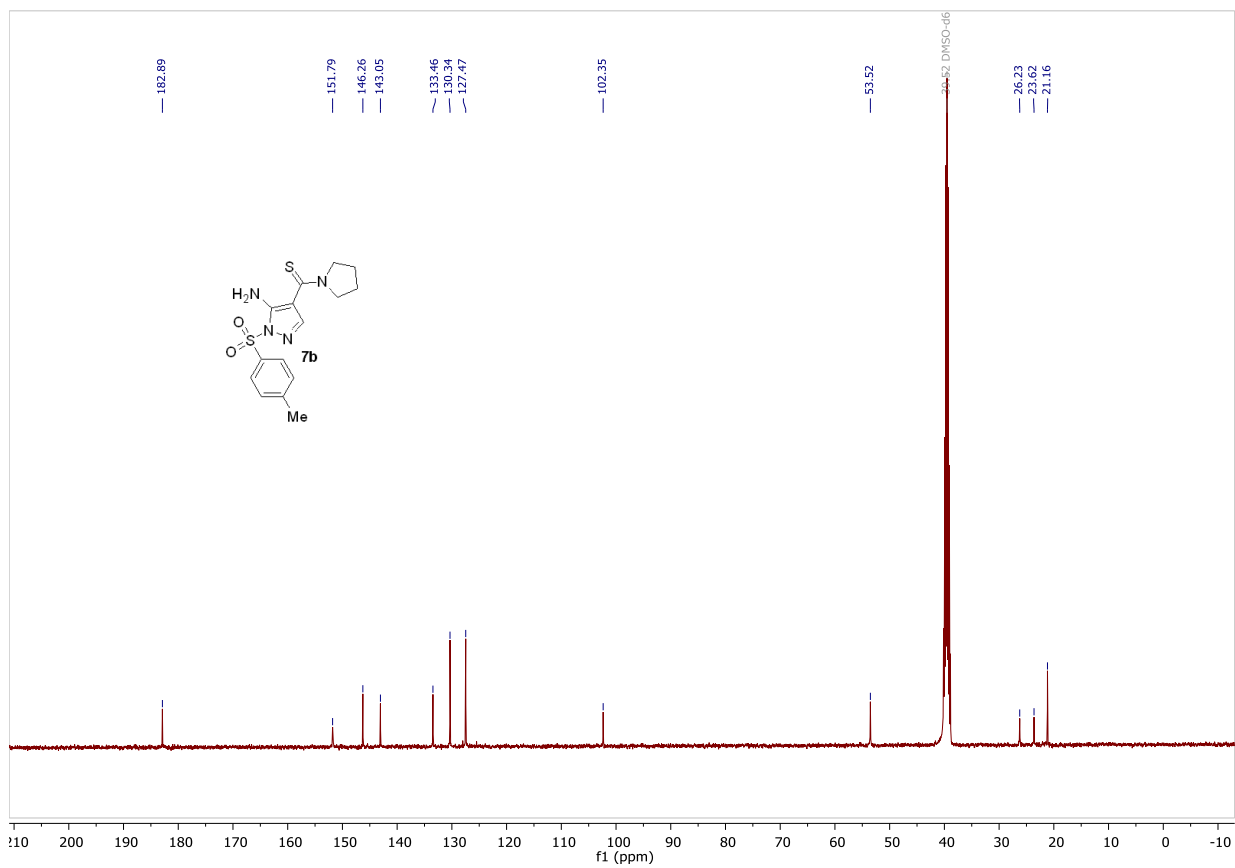

Figure S40.  $^1\text{H}$  NMR spectrum (DMSO- $d_6$ ) of **7c**.

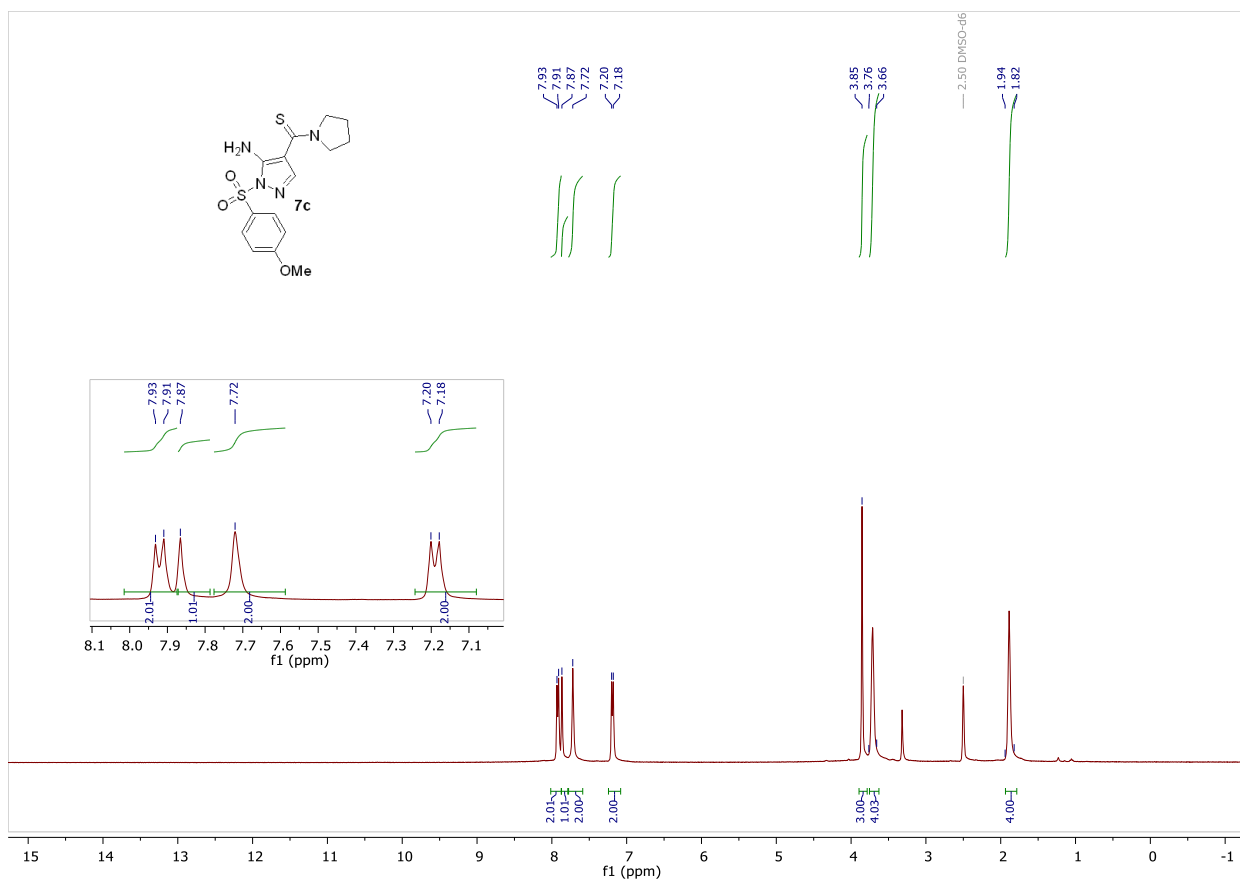

Figure S41.  $^{13}\text{C}$  NMR spectrum (DMSO- $d_6$ ) of **7c**.

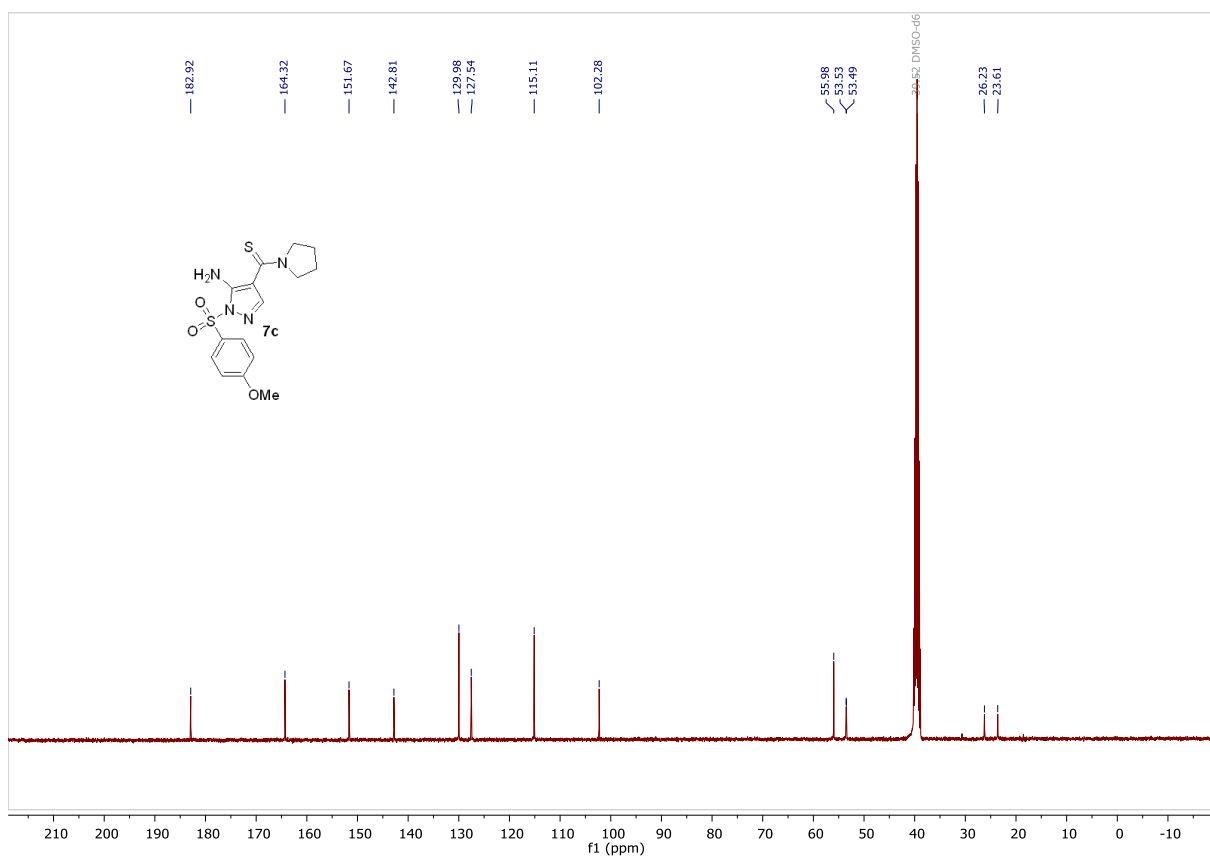

Figure S42.  $^1\text{H}$  NMR spectrum (DMSO- $d_6$ ) of **7d**.

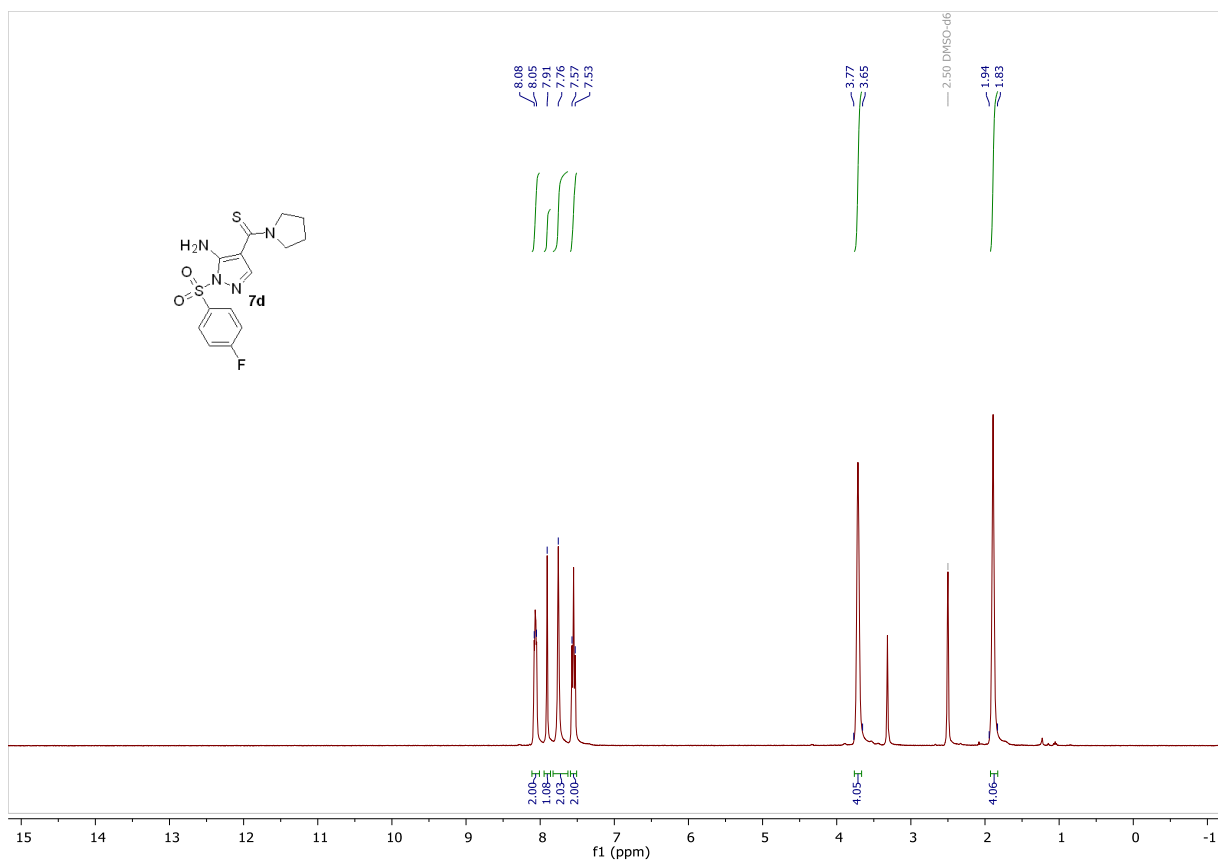

Figure S43.  $^{13}\text{C}$  NMR spectrum (DMSO- $d_6$ ) of **7d**.

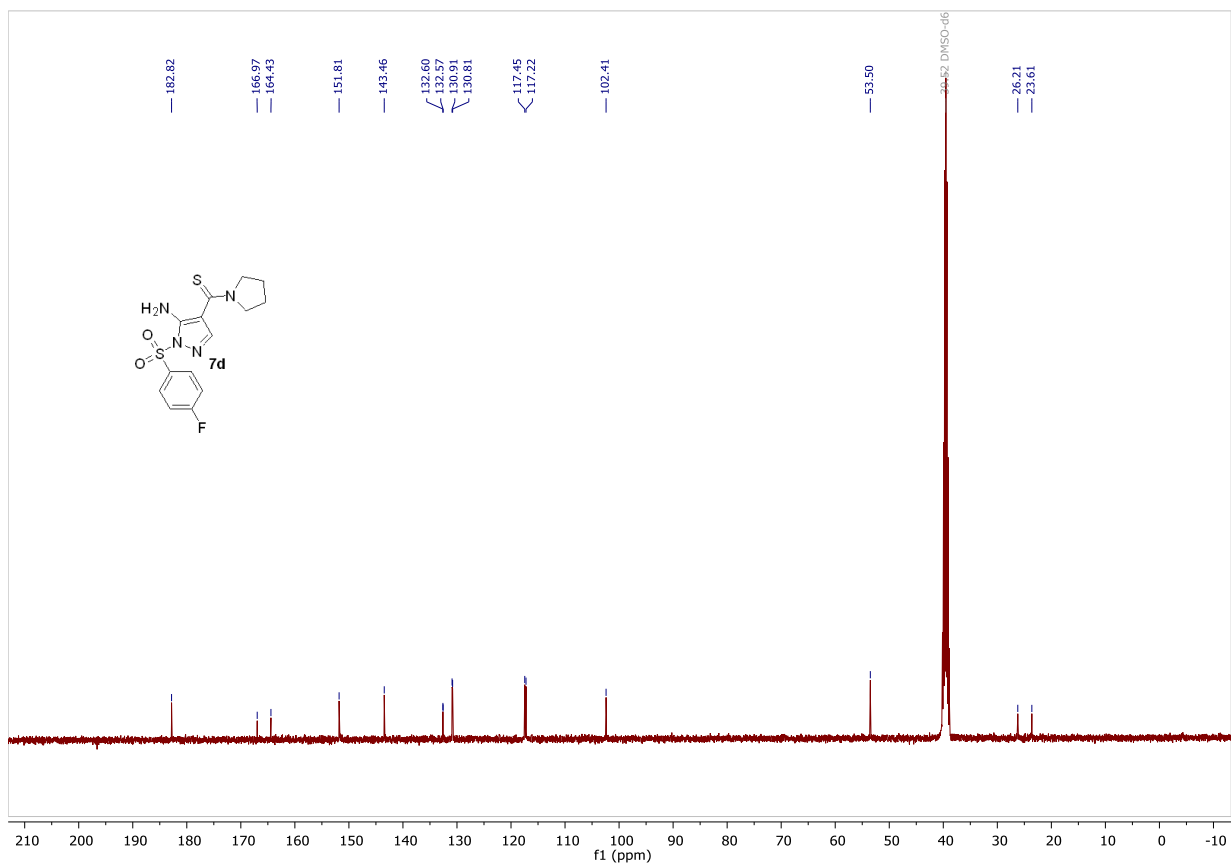



Figure S44.  $^{19}\text{F}$  NMR spectrum (DMSO- $d_6$ ) of **7d**.

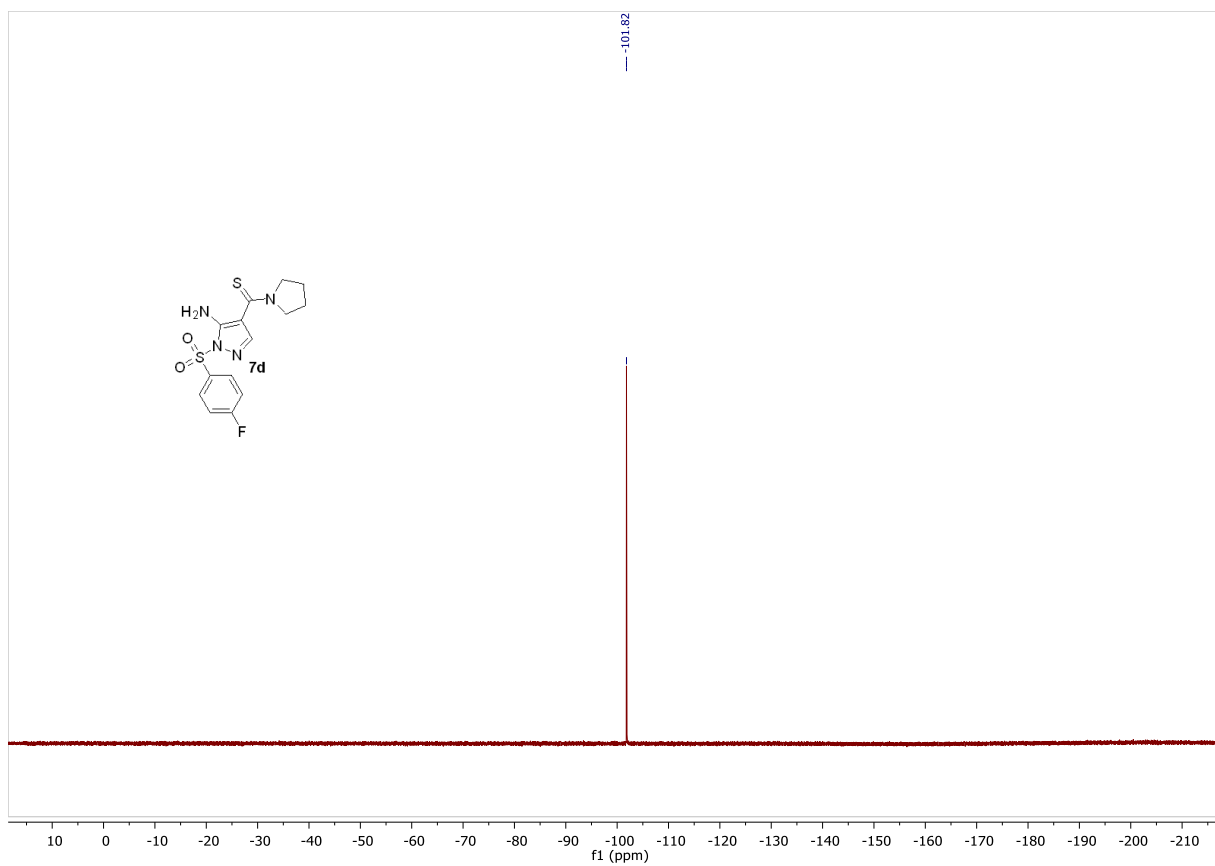

Figure S45.  $^1\text{H}$  NMR spectrum (DMSO- $d_6$ ) of **7e**.

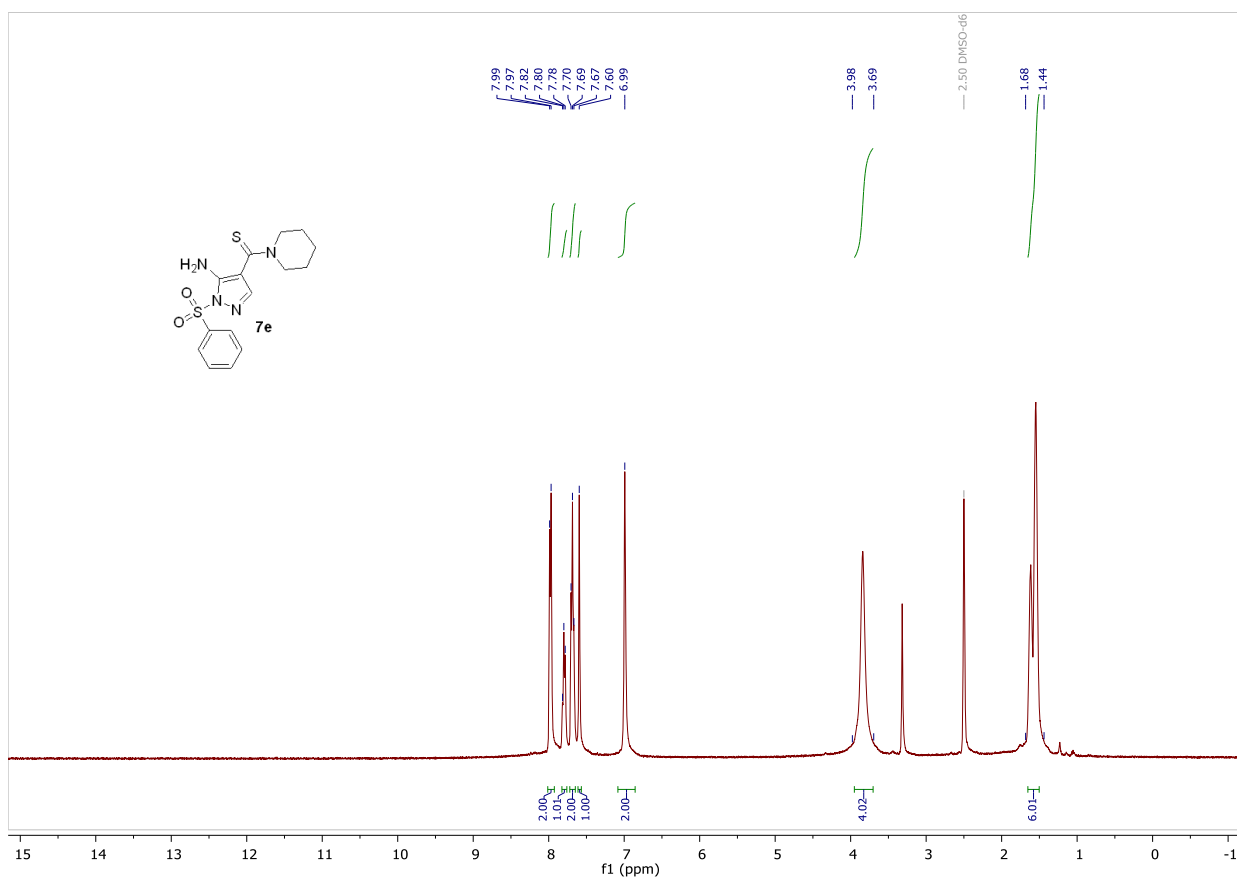

**Figure S46.**  $^{13}\text{C}$  NMR spectrum (DMSO- $d_6$ ) of **7e**.

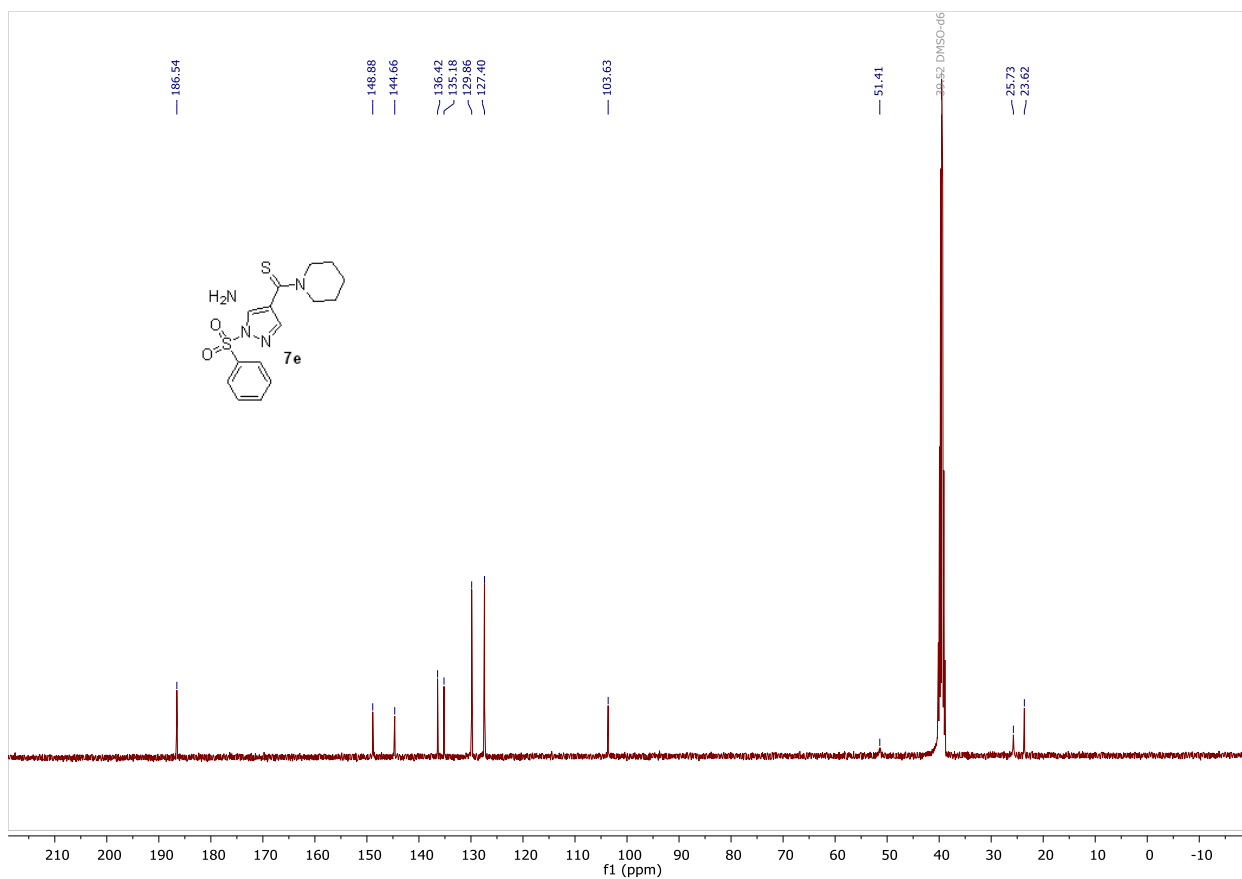

**Figure S47.**  $^1\text{H}$  NMR spectrum (DMSO- $d_6$ ) of **7f**.

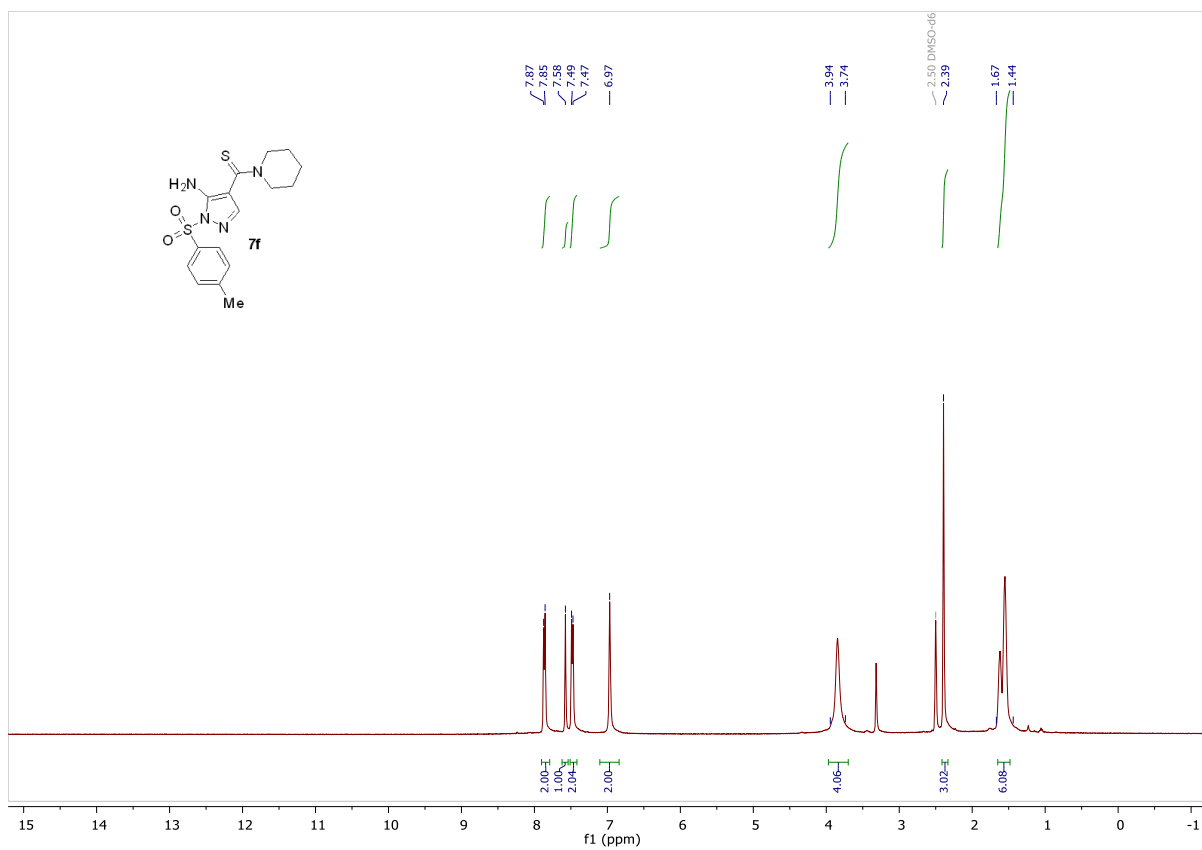

Figure S48.  $^{13}\text{C}$  NMR spectrum (DMSO- $d_6$ ) of **7f**.

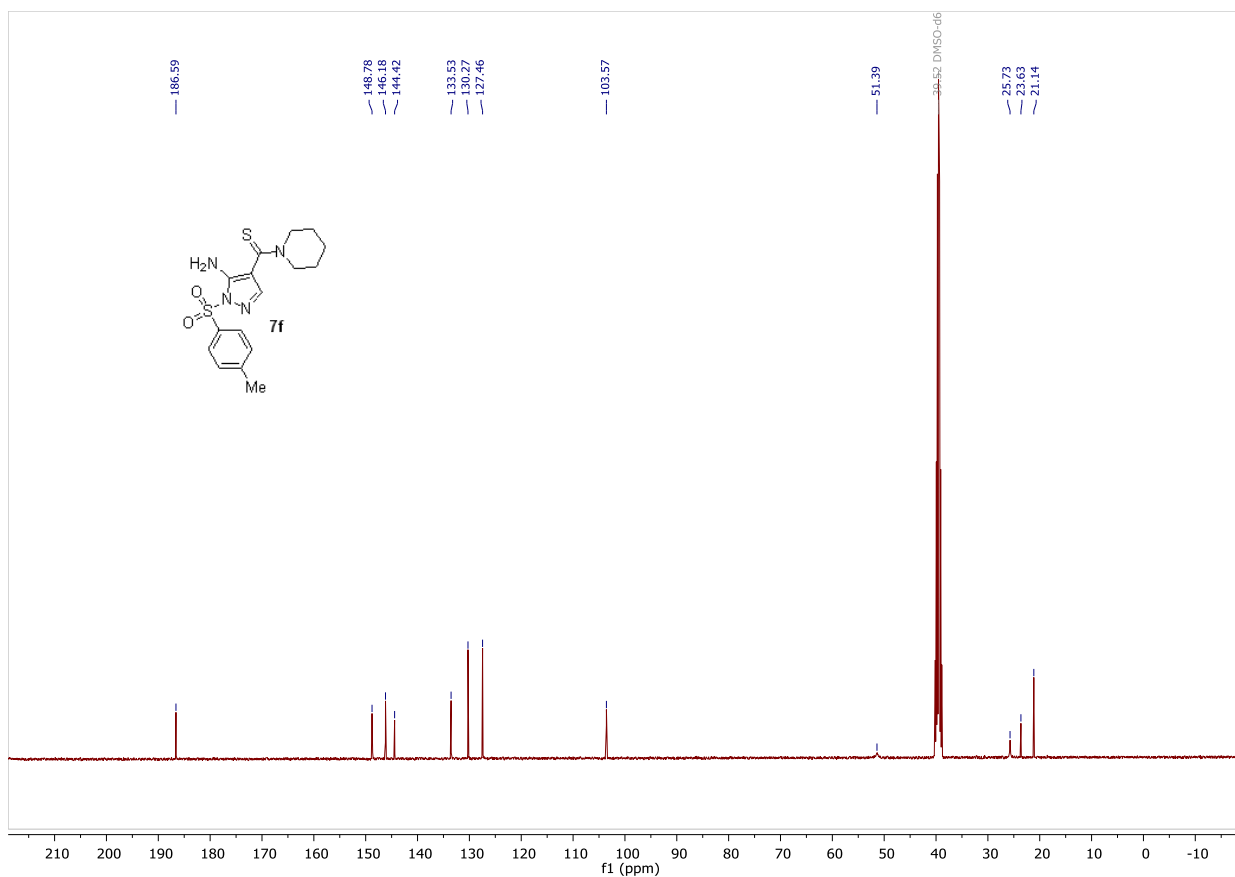

Figure S49.  $^1\text{H}$  NMR spectrum (DMSO- $d_6$ ) of **7g**.

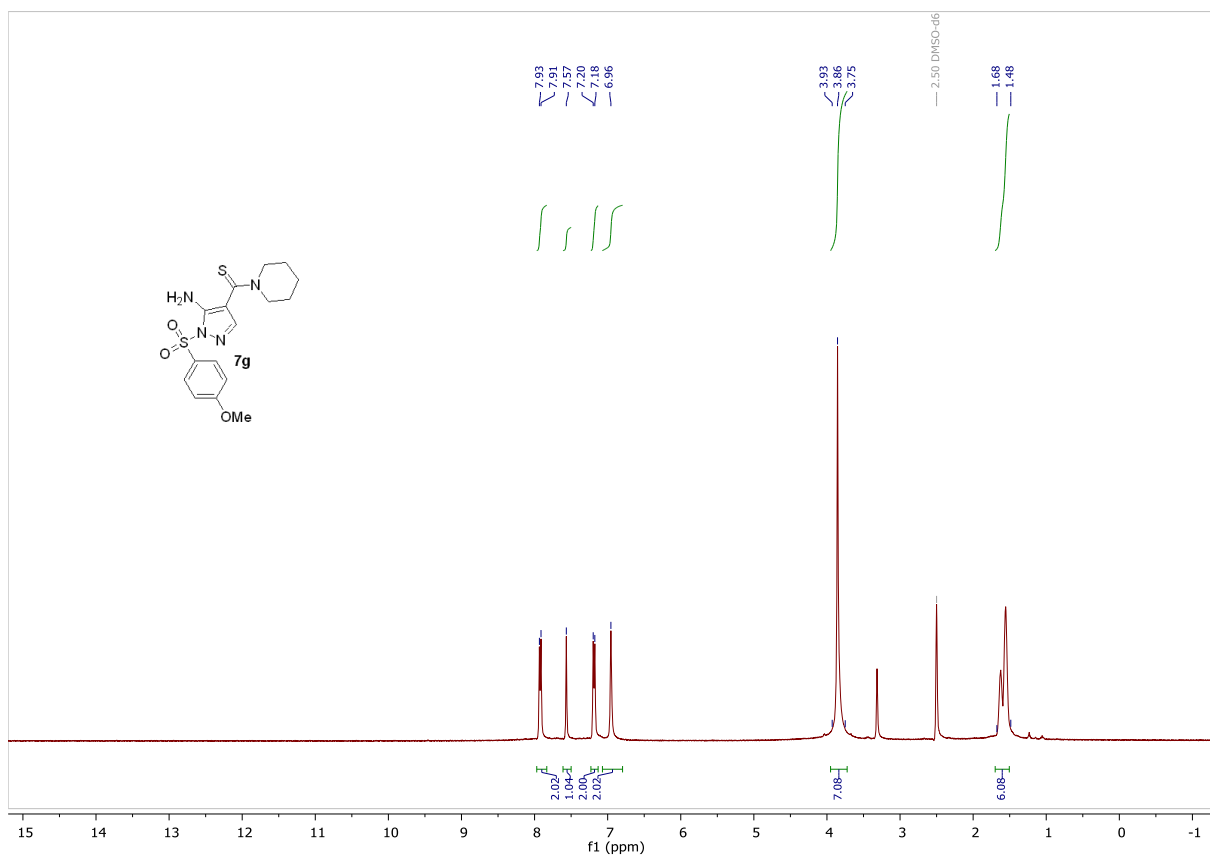

Figure S50.  $^{13}\text{C}$  NMR spectrum (DMSO- $d_6$ ) of **7g**.

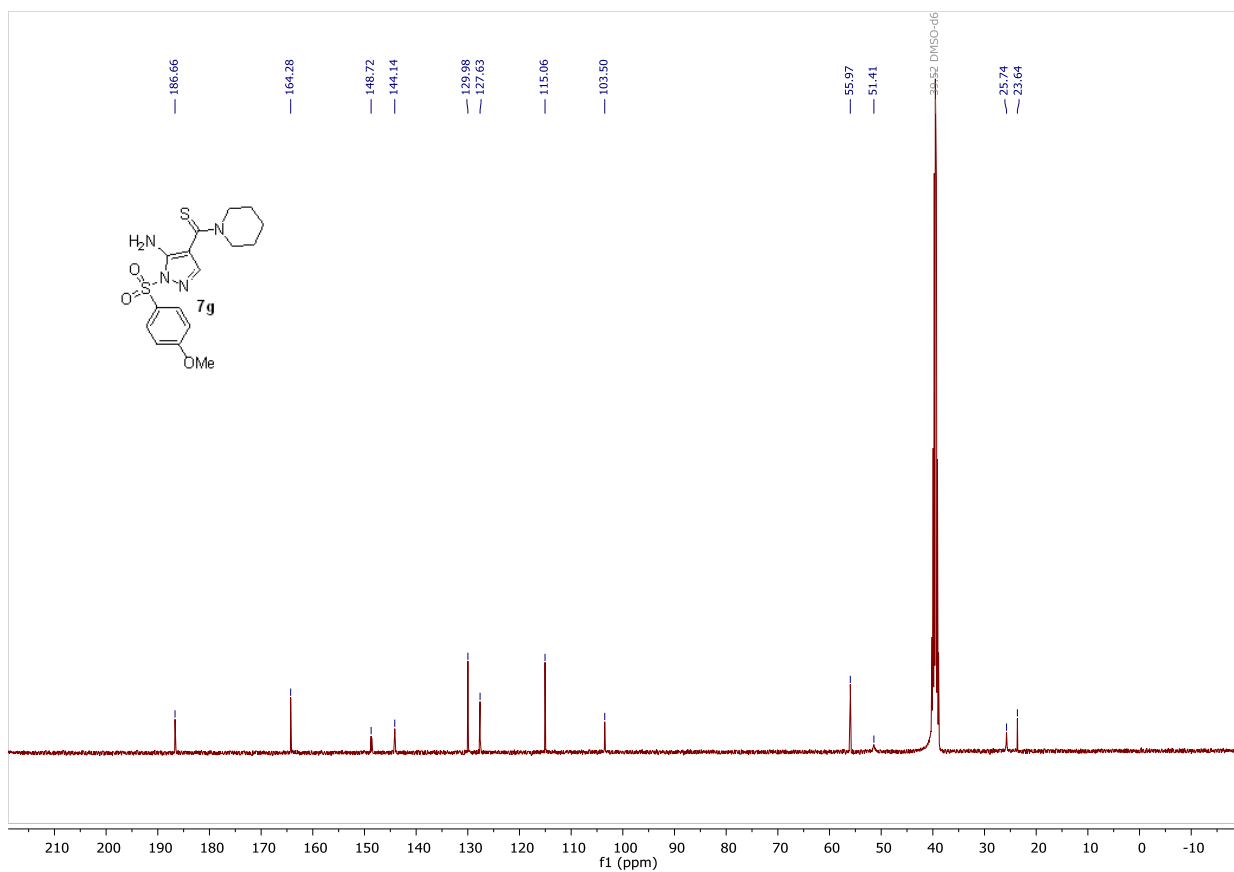

Figure S51.  $^1\text{H}$  NMR spectrum (DMSO- $d_6$ ) of **7h**.

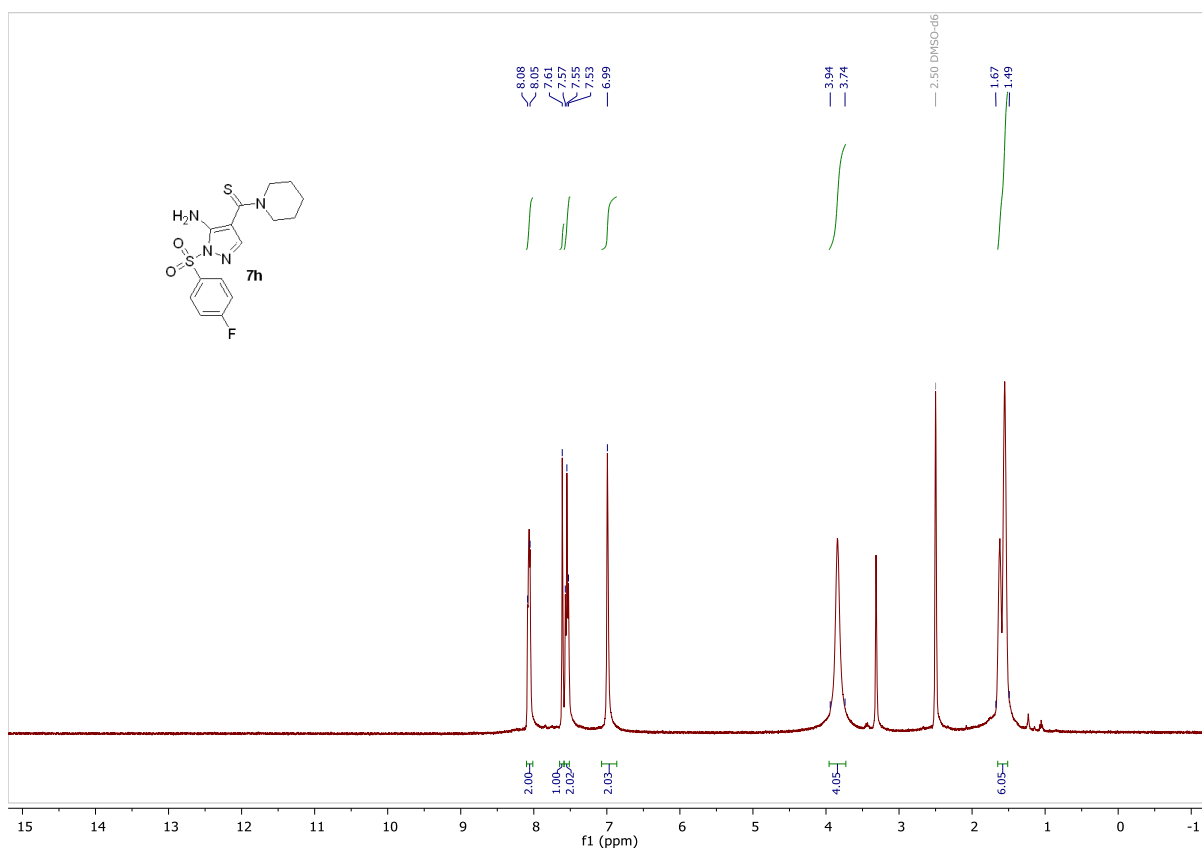

Figure S52.  $^{13}\text{C}$  NMR spectrum (DMSO- $d_6$ ) of **7h**.

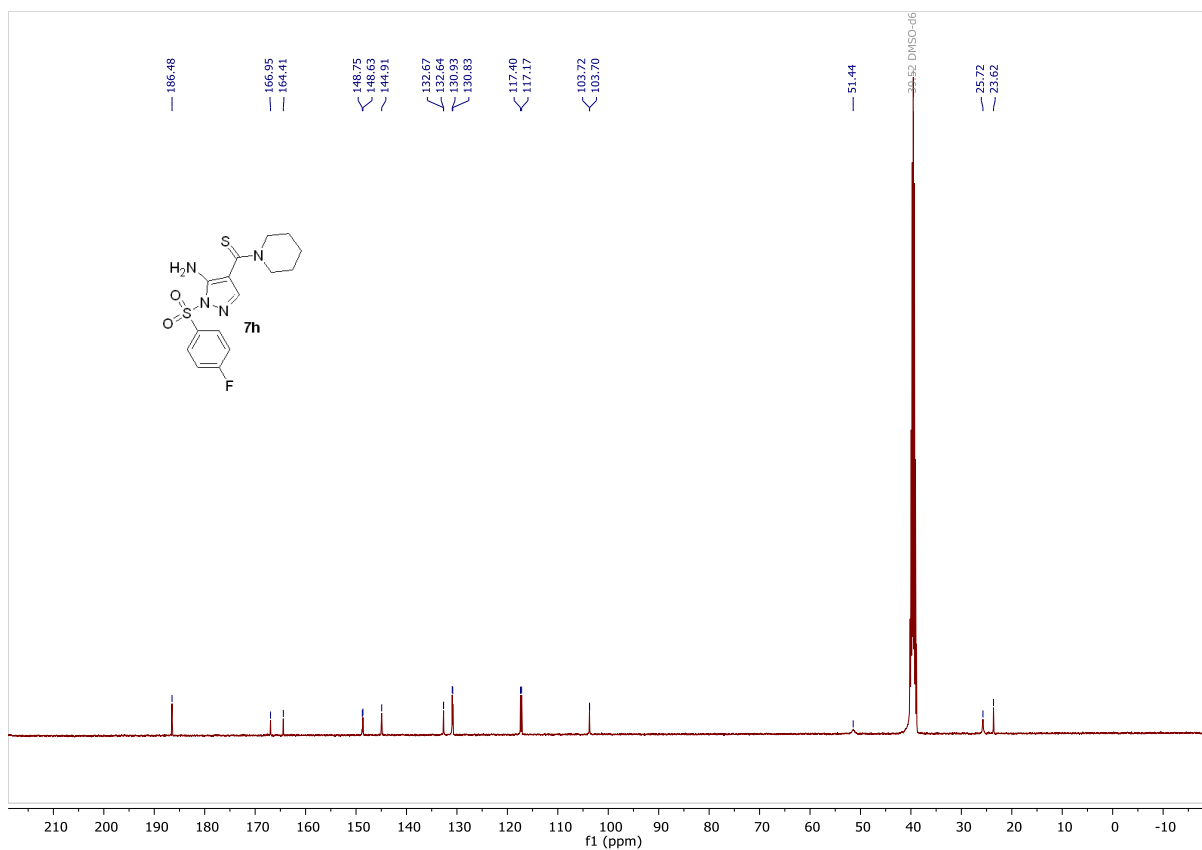

Figure S53.  $^1\text{H}$  NMR spectrum (DMSO- $d_6$ ) of **7i**.

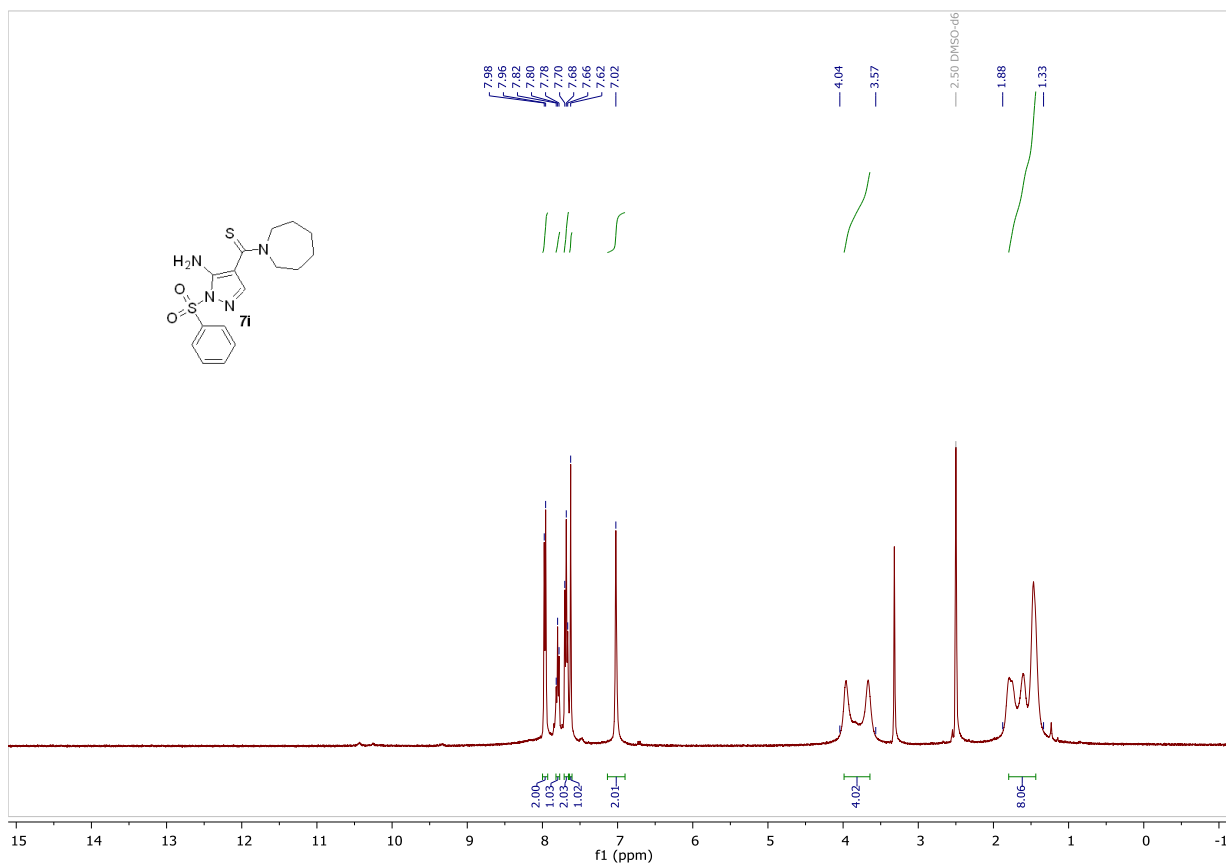

Figure S54.  $^{13}\text{C}$  NMR spectrum (DMSO- $d_6$ ) of **7i**.

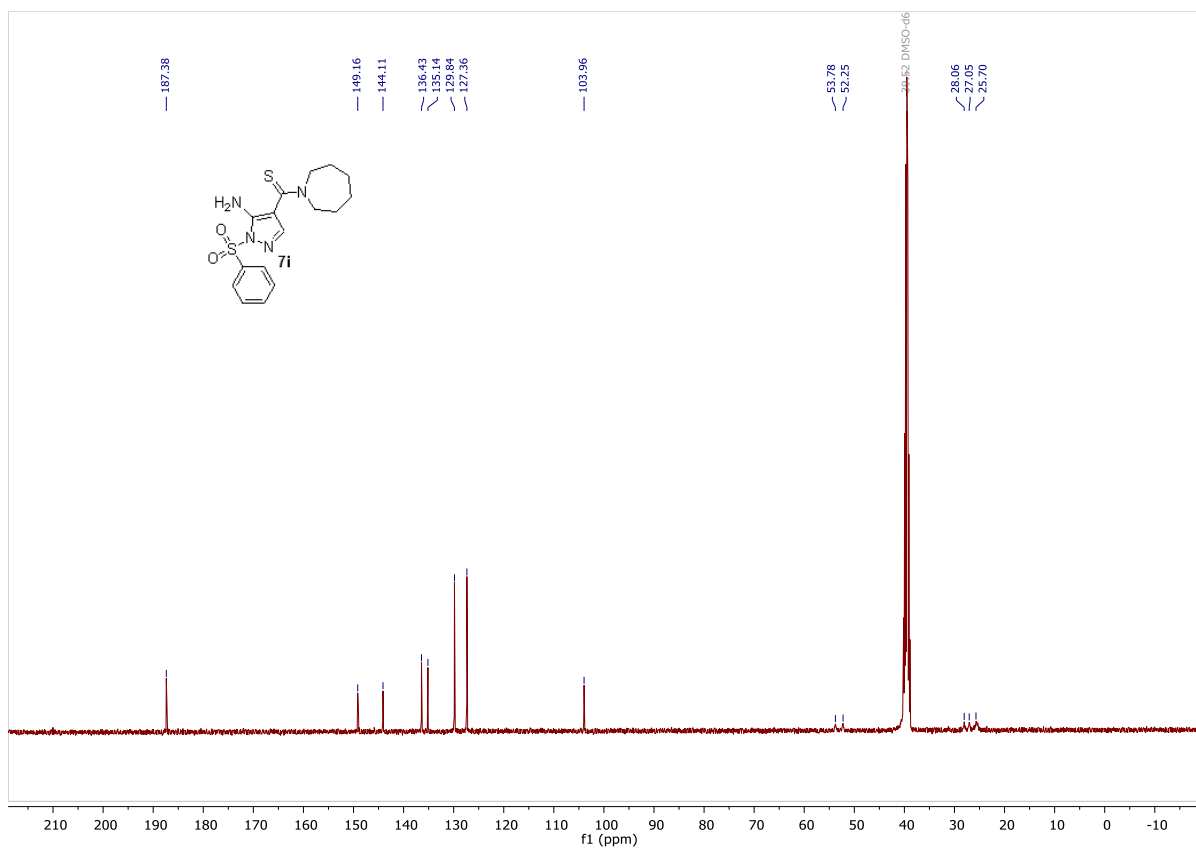

Figure S55.  $^1\text{H}$  NMR spectrum (DMSO- $d_6$ ) of **7j**.

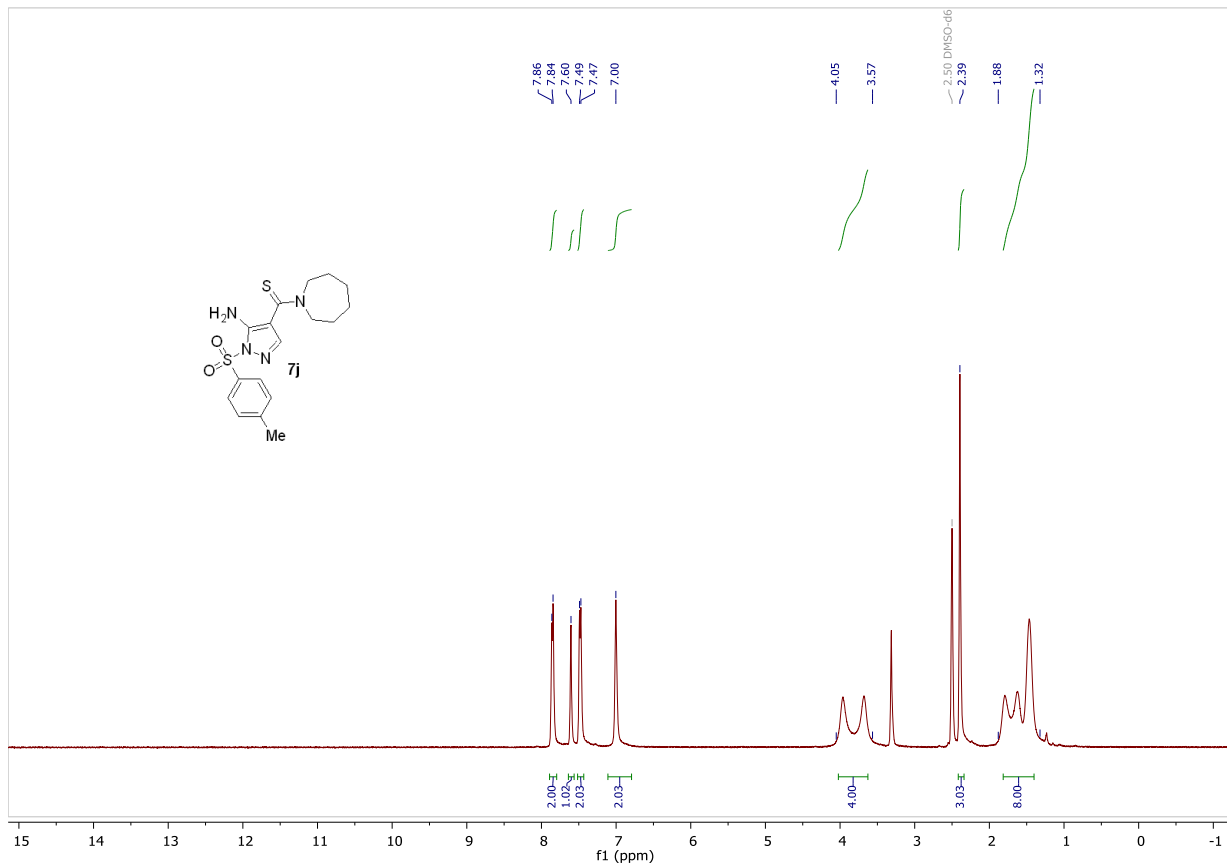

Figure S56.  $^{13}\text{C}$  NMR spectrum (DMSO- $d_6$ ) of **7j**.

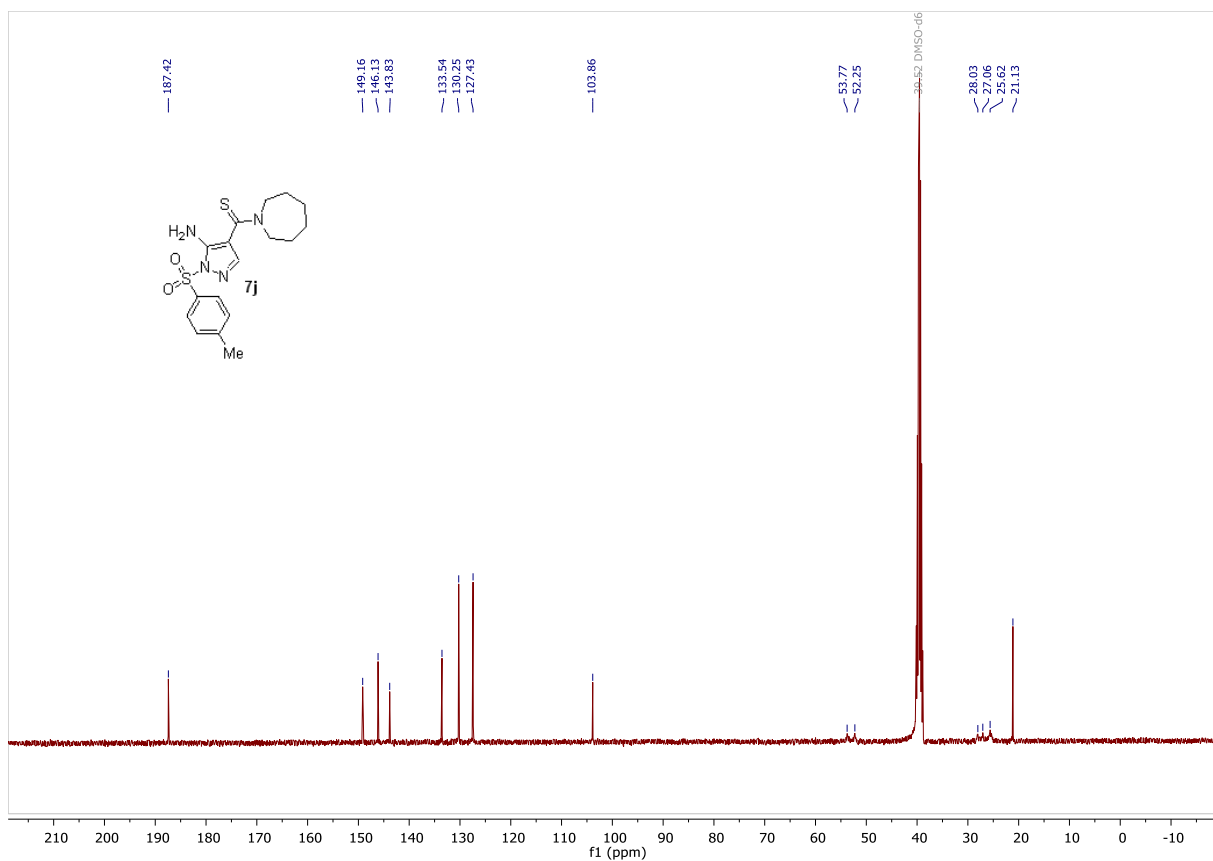

Figure S57.  $^1\text{H}$  NMR spectrum (DMSO- $d_6$ ) of **7k**.

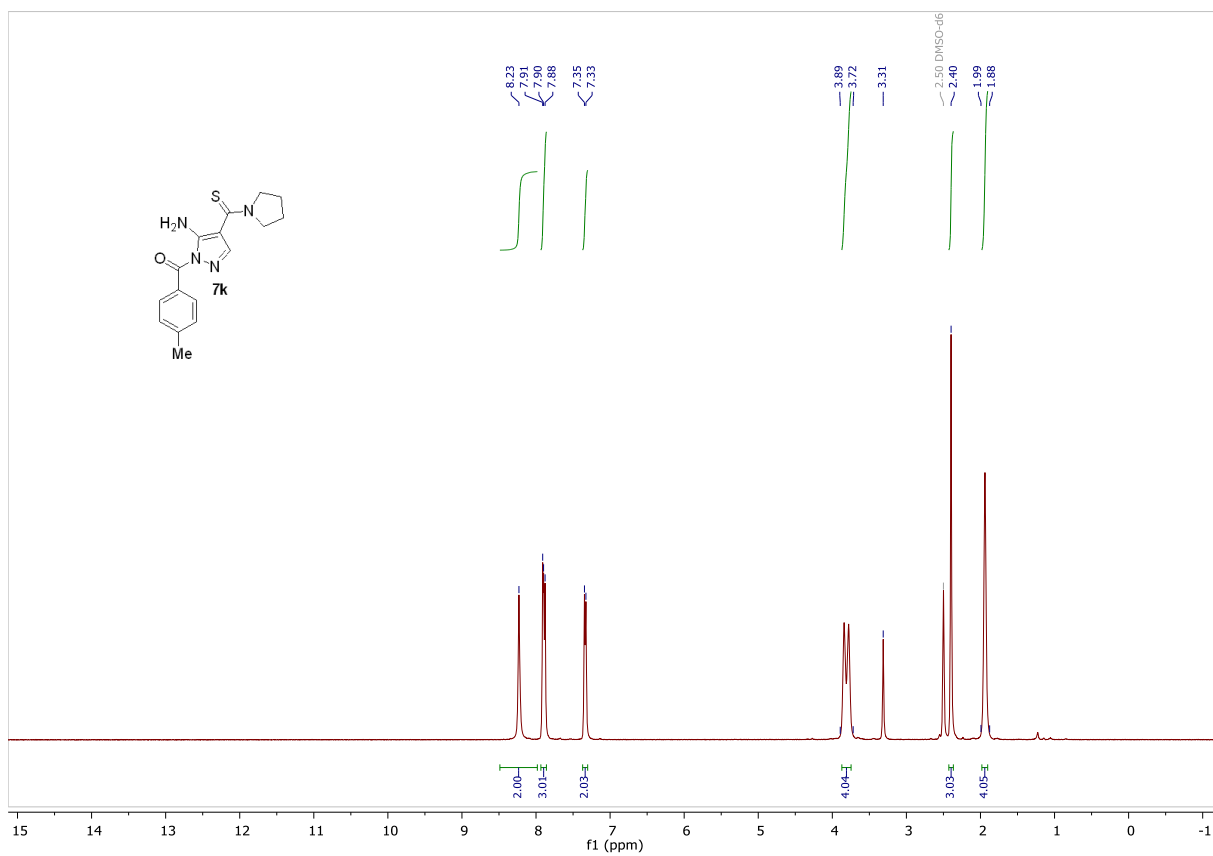

**Figure S58.**  $^{13}\text{C}$  NMR spectrum (DMSO- $d_6$ ) of **7k**.

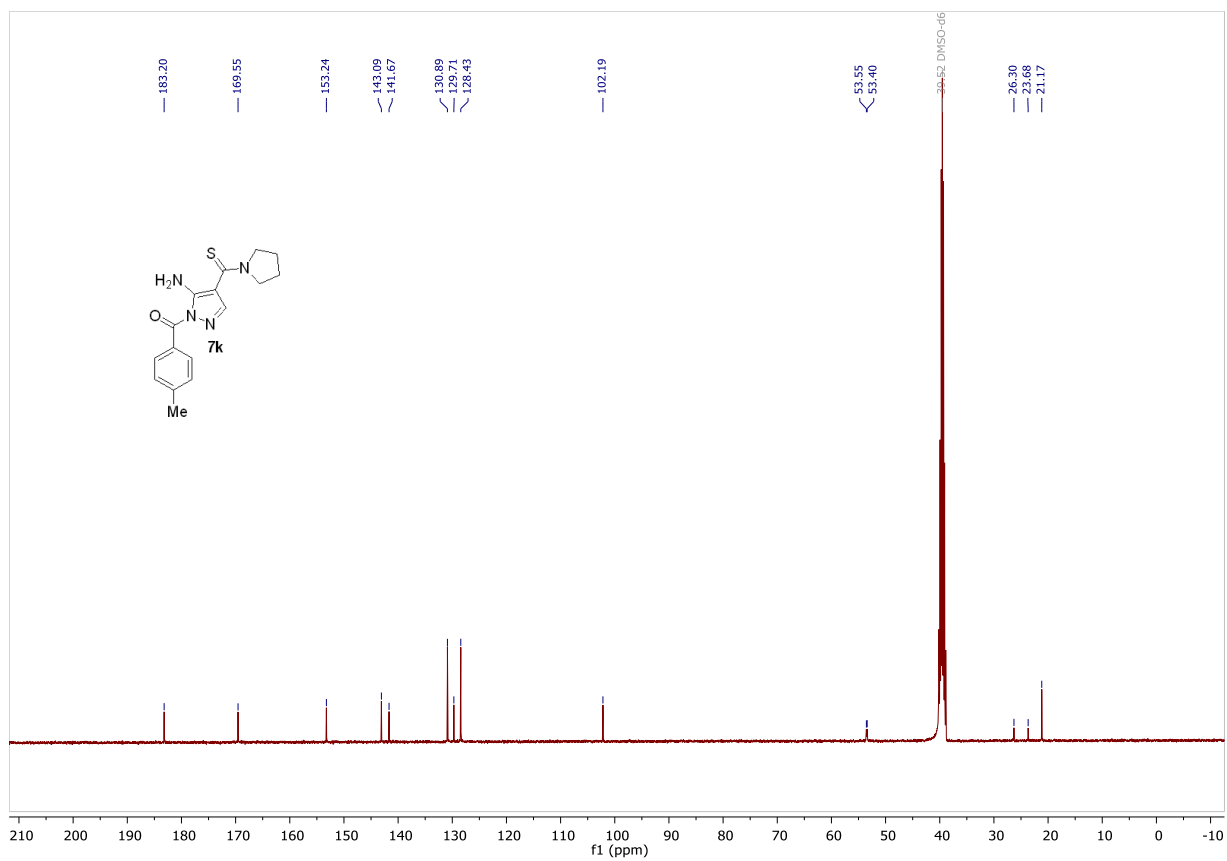

Supplement: Additional file 2 [file 1860-5397-19-87-S2.pdf]
